# Supplementary material for: Synthesis of 5-amino- and 5-hydroxy-3,3-difluoropiperidines
Source: Royal Society of Chemistry journal article supplement (doi:10.1039/c0ob00231c), 2010-01-01
Supplement: c0ob00231c.pdf [file c0ob00231c.pdf]

## SUPPORTING INFORMATION

for

### Synthesis of 5-amino- and 5-hydroxy-3,3-difluoropiperidines

Riccardo Surmont,<sup>a</sup> Guido Verniest,<sup>a</sup> Jan Willem Thuring,<sup>b</sup> Peter ten Holte,<sup>b</sup>  
Frederik Deroose,<sup>b</sup> Norbert De Kimpe<sup>a,\*</sup>

<sup>a</sup> Department of Organic Chemistry, Faculty of Bioscience Engineering, Ghent University, Coupure Links 653, B-9000 Ghent, Belgium

<sup>b</sup> Johnson & Johnson, Pharmaceutical Research & Development, Division of Janssen Pharmaceutica NV, Turnhoutseweg 30, B-2340 Beerse, Belgium

E-mail: norbert.dekimpe@ugent.be

#### **Synthetic procedures and spectroscopic data for all new compounds 5a, 6b-d, 8-11, 13-**

#### **16.**

**2,2-Difluoropent-4-en-1-ol 4.** To a solution of 19.8 g (145.5 mmol, 1 equiv) of 2,2-difluoro-4-pentenoic acid **3** in 500 mL of dry diethyl ether was added carefully 11.05 g (291 mmol, 2 equiv) of LiAlH<sub>4</sub> pellets in portions at 0°C. After stirring the reaction mixture for 2 hours at 0°C an additional portion of 5.5 g (145.5 mmol, 1 equiv) of LiAlH<sub>4</sub> was added and the mixture was further stirred for 3 hours at room temperature. After completion of the reaction, the mixture was cooled to 0°C and firstly 16.5 mL of water was added dropwise and secondly 16.5 mL of a 15% aq. NaOH solution was added dropwise. Finally 50 mL of water was added and the slurry was stirred for 1 hour and then filtered over a Celite plug. The filtrate was washed with 200 mL of water and the organic phase was dried over MgSO<sub>4</sub>. After removal of the solvent in vacuo at room temperature, the crude 2,2-difluoropent-4-en-1-ol **4** was purified via distillation (32°C, 60 mbar) to yield 14.2 g of pure 2,2-difluoropent-4-en-1-ol **4** (116 mmol, 80% yield). Spectral data were in accordance with those found in the literature.<sup>i</sup>

**2,2-Difluoropent-4-en-1-yl 4-methylbenzenesulfonate 5a.** To a solution of 3.03 g (24.84 mmol, 1 equiv) of 2,2-difluoropent-4-en-1-ol **4** in 50 mL of pyridine was added 5.20 g (27.32 mmol, 1.1 equiv) of tosyl chloride at 0°C. After stirring for 15 hours at room temperature the reaction mixture was poured into 100 mL of water and was extracted with 3 × 50 mL of dichloromethane. The combined organic phases were washed with 100 mL of a saturated NaHCO<sub>3</sub> solution and then dried over MgSO<sub>4</sub>. After evaporation of the solvents in vacuo 4.37 g of the crude 2,2-difluoropent-4-en-1-yl 4-methylbenzenesulfonate **5a** (15.83 mmol, 64% yield) was obtained as a red oil which was pure enough for further transformations. <sup>1</sup>H NMR (CDCl<sub>3</sub>): δ 2.45 (3H, s, CH<sub>3</sub>); 2.66 (2H, td, J = 16.3 Hz, 7.2 Hz, CH<sub>2</sub>); 4.10 (2H, t, J = 11.6 Hz, OCH<sub>2</sub>); 5.16-5.20 (1H, m, =CH<sub>a</sub>H<sub>b</sub>); 5.22-5.24 (1H, m, =CH<sub>a</sub>H<sub>b</sub>); 5.61-5.76 (1H, m,

=CH); 7.37 (2H, d,  $J = 8.2$  Hz,  $2 \times \text{CH}_{\text{ar}}$ ); 7.79 (2H, d,  $J = 8.2$  Hz,  $2 \times \text{CH}_{\text{ar}}$ ).  $^{19}\text{F}$  NMR ( $\text{CDCl}_3$ ):  $\delta -104.7$  (2F, tt,  $J = 16.3$  Hz, 11.6 Hz,  $\text{CF}_2$ ).  $^{13}\text{C}$  NMR ( $\text{CDCl}_3$ ):  $\delta 21.5$  ( $\text{CH}_3$ ); 38.0 (t,  $J = 24.2$  Hz,  $\text{CH}_2$ ); 67.4 (t,  $J = 35.8$  Hz,  $\text{OCH}_2$ ); 119.6 (t,  $J = 244.6$  Hz,  $\text{CF}_2$ ); 121.6 ( $=\text{CH}_2$ ); 127.4 (t,  $J = 5.8$  Hz,  $=\text{CH}$ ); 127.9 ( $2 \times \text{CH}_{\text{ar}}$ ); 129.9 ( $2 \times \text{CH}_{\text{ar}}$ ); 132.0 ( $\text{SO}_2\text{C}_{\text{ar}}$ ); 145.5 ( $\text{C}_{\text{ar}}\text{CH}_3$ ). IR (NaCl,  $\text{cm}^{-1}$ ):  $\nu = 3084$  ( $=\text{CH}$ ); 1647 ( $\text{C}=\text{C}$ ); 1599 ( $\text{C}_6\text{H}_4$ ); 1373 ( $\text{S}=\text{O}$ ). MS (ES+)  $m/z$  (%): 294 ( $\text{M}+\text{NH}_4^+$ , 100).

**5-Azido-4,4-difluoro-1-pentene 6b.** To a solution of 3.32 g (13.07 mmol, 1 equiv) of 2,2-difluoro-4-pentenyl trifluoromethanesulfonate **5b** in 100 mL of DMSO under a  $\text{N}_2$  atmosphere was added 0.93 g (14.38 mmol, 1.1 equiv) of sodium azide at room temperature. The mixture was stirred for 24 hours at room temperature and then poured into 150 mL of diethyl ether. The organic phase was washed three times with 100 mL of brine and 100 mL of water. After drying the organic phase over  $\text{MgSO}_4$ , the solvent was evaporated in vacuo and the crude alkylazide was distilled under reduced pressure to yield 1.29 g of pure 5-azido-4,4-difluoro-1-pentene **6b** (8.78 mmol, 67% yield) as a colorless oil. B.p. =  $30^\circ\text{C}$  (10 mbar).  $^1\text{H}$  NMR ( $\text{CDCl}_3$ ): 2.71 (2H, tdt,  $J = 16.0$  Hz, 7.3 Hz, 1.1 Hz,  $\text{CH}_2$ ); 3.47 (2H, t,  $J = 12.8$  Hz,  $\text{CH}_2\text{N}_3$ ); 5.22-5.28 (1H, m,  $=\text{CH}_a\text{H}_b$ ); 5.28-5.33 (1H, m,  $=\text{CH}_a\text{H}_b$ ); 5.78 (1H, ddt,  $J = 17.5$  Hz, 9.8 Hz, 7.3 Hz,  $=\text{CH}$ ).  $^{19}\text{F}$  NMR ( $\text{CDCl}_3$ ):  $\delta -101.8$  (2F, tt,  $J = 16.0$  Hz, 12.8 Hz,  $\text{CF}_2$ ).  $^{13}\text{C}$  NMR ( $\text{CDCl}_3$ ):  $\delta 38.8$  (t,  $J = 24.2$  Hz,  $\text{CH}_2$ ); 53.2 (t,  $J = 30.6$  Hz,  $\text{CH}_2\text{N}_3$ ); 121.4 ( $=\text{CH}_2$ ); 121.9 (t,  $J = 244.6$  Hz,  $\text{CF}_2$ ); 128.2 (t,  $J = 6.3$  Hz,  $=\text{CH}$ ). IR (NaCl,  $\text{cm}^{-1}$ ):  $\nu = 3087$  ( $=\text{CH}$ ); 2113 ( $\text{N}_3$ ); 1647 ( $\text{C}=\text{C}$ ). Compound **6b** decomposes upon LC-MS or GC-MS analysis.

**N-Benzyl-N-(2,2-difluoropent-4-enyl)amine 6c.** To a solution of 5.44 g (21.42 mmol, 1 equiv) of 2,2-difluoro-4-pentenyl trifluoromethanesulfonate **5b** in 200 mL of THF under a nitrogen atmosphere was added 2.41 g (22.49 mmol, 1.05 equiv) of benzylamine and 6 g (42.84 mmol, 2 equiv) of potassium carbonate at room temperature. The reaction mixture was heated at reflux temperature during 15 hours. After completion of the reaction, the mixture was cooled to room temperature, filtered and poured into 200 mL of water and 100 mL of diethyl ether. The organic layer was separated and the aqueous layer was extracted twice with 100 mL of diethyl ether. The combined organic phases were dried over  $\text{MgSO}_4$  and the solvents were evaporated in vacuo to yield the crude amine **6c** which was further purified via an acid base extraction using dichloromethane and a 3 M aq. HCl solution. The acidic aqueous phase with the protonated amine was basified with a 3 M aq. NaOH solution and extracted with dichloromethane. After drying and evaporation of dichloromethane, 4.48 g of pure *N*-benzyl-*N*-(2,2-difluoropent-4-enyl)amine **6c** (21.21 mmol, 99% yield) was obtained as a red oil.  $^1\text{H}$  NMR ( $\text{CDCl}_3$ ): 1.39-1.67 (1H, s, broad, NH); 2.72 (2H, td,  $J = 16.2$  Hz, 7.2 Hz,  $\text{CH}_2$ ); 2.92 (2H, t,  $J = 13.9$  Hz,  $\text{NCH}_2\text{CF}_2$ ); 3.85 (2H, s,  $\text{NCH}_2\text{Ph}$ ); 5.19 (1H, d,  $J = 10.5$  Hz,  $=\text{CH}_a\text{H}_b$ ); 5.21 (1H, d,  $J = 16.7$  Hz,  $=\text{CH}_a\text{H}_b$ ); 5.78 (1H, ddt,  $J = 16.7$  Hz, 10.5 Hz, 7.2 Hz,  $=\text{CH}$ ); 7.30-7.36 (5H, m,  $5 \times \text{CH}_{\text{ar}}$ ).  $^{19}\text{F}$  NMR ( $\text{CDCl}_3$ ):  $\delta -101.9$  (2F, tt,  $J = 16.2$  Hz, 13.9 Hz,  $\text{CF}_2$ ).  $^{13}\text{C}$  NMR ( $\text{CDCl}_3$ ):  $\delta 39.1$  (t,  $J = 24.8$  Hz,  $\text{CH}_2$ ); 51.8 (t,  $J = 27.7$  Hz,  $\text{NCH}_2\text{CF}_2$ ); 53.5 ( $\text{NCH}_2\text{Ph}$ ); 120.1 ( $=\text{CH}_2$ ); 123.5 (t,  $J = 241.7$  Hz,  $\text{CF}_2$ ); 127.0 ( $\text{CH}_{\text{ar}}$ ); 127.9 ( $2 \times \text{CH}_{\text{ar}}$ ); 128.3 ( $2 \times \text{CH}_{\text{ar}}$ ); 129.4 (t,  $J = 5.8$  Hz,  $=\text{CH}$ ); 139.7 ( $\text{C}_{\text{ar}}$ ). IR (NaCl,  $\text{cm}^{-1}$ ):  $\nu = 3349$  (NH); 3085 ( $=\text{C}-\text{H}$ ); 3028 ( $\text{CH}_{\text{ar}}$ ); 2922; 2850; 1646 ( $\text{C}=\text{C}$ ); 1603 ( $\text{C}_{\text{ar}}=\text{C}_{\text{ar}}$ ); 1496 ( $\text{C}_{\text{ar}}=\text{C}_{\text{ar}}$ ); 1454; 1431; 1340; 1282; 1121; 996; 927; 879; 741; 699. GC-MS (EI):  $m/z$  (%): 211 ( $\text{M}^+$ , 3); 196 (6); 120 ( $\text{M}^+-\text{C}_6\text{H}_5\text{CH}_2$ , 43); 106 (5); 91 ( $\text{C}_6\text{H}_5\text{CH}_2^+$ , 100); 77 (2); 65 (7). Anal. Calcd. for  $\text{C}_{12}\text{H}_{15}\text{F}_2\text{N}$ : C, 68.23; H, 7.16; N, 6.63. Found: C, 68.01; H, 7.22; N, 6.41.

**N-Benzyl-N-chloro-2,2-difluoro-4-penten-1-amine 6d.** To a cooled solution ( $0^\circ\text{C}$ ) of 4.52 g (21.42 mmol, 1 equiv) of *N*-benzyl-*N*-(2,2-difluoropent-4-enyl)amine **6c** in 150 mL of dichloromethane was added portionwise 2.86 g (21.42 mmol, 1 equiv) of *N*-

chlorosuccinimide. After the mixture had been stirred for 2 hours at 0°C the solvent was removed and the residue was taken up in hexane. After removal of the solid succinimide by filtration, the filtrate was concentrated to yield 5.05 g of virtually pure *N*-benzyl-*N*-chloro-2,2-difluoro-4-penten-1-amine **6d** (20.56 mmol, 96% yield) as a yellow oil which was pure enough for further transformations. <sup>1</sup>H NMR (CDCl<sub>3</sub>): 2.77 (2H, td, J = 16.2 Hz, 7.2 Hz, CH<sub>2</sub>); 3.37 (2H, t, J = 11.8 Hz, NCH<sub>2</sub>CF<sub>2</sub>); 4.17 (2H, s, NCH<sub>2</sub>Ph); 5.16-5.23 (1H, m, =CH<sub>a</sub>H<sub>b</sub>); 5.24-5.27 (1H, m, =CH<sub>a</sub>H<sub>b</sub>); 5.74 (1H, ddt, J = 17.2 Hz, 10.0 Hz, 7.2 Hz, =CH); 7.30-7.40 (5H, m, 5 × CH<sub>ar</sub>). <sup>19</sup>F NMR (CDCl<sub>3</sub>): δ -98.0 (2F, tt, J = 16.2 Hz, 11.8 Hz, CF<sub>2</sub>). <sup>13</sup>C NMR (CDCl<sub>3</sub>): δ 39.0 (t, J = 24.2 Hz, CH<sub>2</sub>); 64.5 (t, J = 30.6 Hz, NCH<sub>2</sub>CF<sub>2</sub>); 68.9 (NCH<sub>2</sub>Ph); 120.7 (=CH<sub>2</sub>); 122.3 (t, J = 242.9 Hz, CF<sub>2</sub>); 128.2 (CH<sub>ar</sub>); 128.4 (2 × CH<sub>ar</sub>); 128.8 (t, J = 5.8 Hz, =CH); 129.2 (2 × CH<sub>ar</sub>); 136.1 (C<sub>ar</sub>). IR (NaCl, cm<sup>-1</sup>): ν = 3086 (=C-H); 3067 (=C-H); 3033 (CH<sub>ar</sub>); 2919; 2855; 1740; 1721; 1647 (C=C); 1604 (C<sub>ar</sub>=C<sub>ar</sub>); 1497 (C<sub>ar</sub>=C<sub>ar</sub>); 1456; 1431; 1305; 1280; 1126; 1072; 1043; 994; 929; 879; 750; 699. GC-MS (EI): *m/z* (%): 244/246 (M<sup>+</sup>-H, 3/1); 208 (M<sup>+</sup>-H-HCl, 9); 196 (6); 154/156 (M<sup>+</sup>-C<sub>6</sub>H<sub>5</sub>CH<sub>2</sub>, 8/3); 120 (5); 104 (4); 91 (C<sub>6</sub>H<sub>5</sub>CH<sub>2</sub>, 100); 77 (2).

**1-Benzyl-5-chloro-3,3-difluoropiperidine 8a.** To a suspension of 0.64 g (1.74 mmol, 0.1 equiv) of tetrabutylammonium iodide in 70 mL of chloroform at 50°C under N<sub>2</sub> atmosphere was added 4.27 g (17.4 mmol, 1 equiv) of *N*-benzyl-*N*-chloro-2,2-difluoro-4-penten-1-amine **6d**. The solution was kept at this temperature for 15 hours. After the mixture had cooled to room temperature, the solvent was evaporated in vacuo. The residue, which contained 18% of pyrrolidine **7a** and 82% of piperidine **8a**, was dissolved in 70 mL of dichloroethane and 0.73 g (17.4 mmol, 1 equiv) of LiCl was added. The mixture was heated at reflux temperature during 60 hours. When the conversion of pyrrolidine toward piperidine was complete, the mixture was cooled, filtered and the solvent was evaporated in vacuo. The crude piperidine was isolated from the residue by flash chromatography (hexane/EtOAc 99:1, R<sub>f</sub> = 0.06) to yield 3.67 g of pure 1-benzyl-5-chloro-3,3-difluoropiperidine **8a** (15.0 mmol, 86% yield) as a colorless oil. <sup>1</sup>H NMR (CDCl<sub>3</sub>): 1.89 (1H, dddd, J = 30.6 Hz, 13.1 Hz, 11.3 Hz, 6.1 Hz, CH<sub>a</sub>H<sub>b</sub>); 2.21 (1H, t, J = 11.3 Hz, NCH<sub>a</sub>H<sub>b</sub>CHCl); 2.31 (1H, ddd, J = 27.3 Hz, 11.1 Hz, 3.3 Hz, NCH<sub>a</sub>CH<sub>b</sub>CF<sub>2</sub>); 2.57-2.74 (1H, m, CH<sub>a</sub>H<sub>b</sub>); 3.01 (1H, t, J = 11.1 Hz, NCH<sub>a</sub>H<sub>b</sub>CF<sub>2</sub>); 3.14 (1H, d, J = 11.3 Hz, NCH<sub>a</sub>H<sub>b</sub>CHCl); 3.60 (1H, d, J = 13.5 Hz, NCH<sub>a</sub>H<sub>b</sub>Ph); 3.64 (1H, d, J = 13.5 Hz, NCH<sub>a</sub>H<sub>b</sub>Ph); 4.04 (1H, tt, J = 11.3 Hz, 4.9 Hz, CHCl); 7.22-7.35 (5H, m, 5 × CH<sub>ar</sub>). <sup>19</sup>F NMR (CDCl<sub>3</sub>): δ -97.5 (1F, d, J = 246.0 Hz, CF<sub>a</sub>F<sub>b</sub>); -99.7 (1F, dddt, J = 246.0 Hz, 30.6 Hz, 27.3 Hz, 11.1 Hz, CF<sub>a</sub>F<sub>b</sub>). <sup>13</sup>C NMR (CDCl<sub>3</sub>): δ 42.5 (t, J = 24.2 Hz, CH<sub>2</sub>); 50.3 (d, J = 11.5 Hz, CHCl); 57.0 (dd, J = 30.6 Hz, 24.8 Hz, NCH<sub>2</sub>CF<sub>2</sub>); 59.2 (NCH<sub>2</sub>CHCl); 61.0 (NCH<sub>2</sub>Ph); 119.3 (t, J = 243.4 Hz, CF<sub>2</sub>); 127.5 (CH<sub>ar</sub>); 128.4 (2 × CH<sub>ar</sub>); 128.8 (2 × CH<sub>ar</sub>); 136.5 (C<sub>ar</sub>). IR (NaCl, cm<sup>-1</sup>): ν = 3030 (CH<sub>ar</sub>); 2924; 2821; 1604 (C<sub>ar</sub>=C<sub>ar</sub>); 1495 (C<sub>ar</sub>=C<sub>ar</sub>); 1455; 1351; 1310; 1289; 1189; 1097; 1010; 915; 774; 741; 699 (C-Cl). GC-MS (EI): *m/z* (%): 245/247 (M<sup>+</sup>, 30/10); 244/246 (M<sup>+</sup>-H, 28/13); 168/170 (M<sup>+</sup>-C<sub>6</sub>H<sub>5</sub>, 30/10); 154/156 (M<sup>+</sup>-C<sub>6</sub>H<sub>5</sub>CH<sub>2</sub>, 25/8); 91 (C<sub>6</sub>H<sub>5</sub>CH<sub>2</sub><sup>+</sup>, 100); 77 (2); 65 (10). Anal. Calcd. for C<sub>12</sub>H<sub>14</sub>ClF<sub>2</sub>N: C, 58.66; H, 5.74; N, 5.70. Found: C, 58.42; H, 5.82; N, 5.63.

**1-Benzyl-5-bromo-3,3-difluoropiperidine 8b.** To a solution of 200 mg (0.95 mmol, 1 equiv) of *N*-benzyl-*N*-(2,2-difluoropent-4-enyl)amine **6c** in 5 mL of dichloromethane was added 170 mg (0.95 mmol, 1 equiv) of *N*-bromosuccinimide. After the mixture had been stirred for 2 hours at room temperature the mixture was poured into 20 mL of water and was extracted twice with 20 mL of dichloromethane. The combined organic layers were dried over MgSO<sub>4</sub> and the solvent was evaporated in vacuo. The residue was dissolved in acetone and stirred during 72 hours to convert the intermediate pyrrolidine **7b** into piperidine **8b**. The crude piperidine was then purified by flash chromatography (hexane/EtOAc 7:3, R<sub>f</sub> = 0.58) to

yield 210 mg of pure 1-benzyl-5-bromo-3,3-difluoropiperidine **8b** (0.73 mmol, 77% yield) as a colorless oil. <sup>1</sup>H NMR (CDCl<sub>3</sub>): 2.05 (1H, dtd, J = 30.0 Hz, 11.5 Hz, 4.9 Hz, CH<sub>a</sub>H<sub>b</sub>); 2.35 (1H, t, J = 11.5 Hz, NCH<sub>a</sub>H<sub>b</sub>CHBr); 2.35 (1H, ddd, J = 30.0 Hz, 11.5 Hz, 2.3 Hz, NCH<sub>a</sub>CH<sub>b</sub>CF<sub>2</sub>); 2.74 (1H, t, J = 11.5 Hz, CH<sub>a</sub>H<sub>b</sub>); 3.06 (1H, t, J = 11.5 Hz, NCH<sub>a</sub>H<sub>b</sub>CF<sub>2</sub>); 3.22 (1H, d, J = 11.5 Hz, NCH<sub>a</sub>H<sub>b</sub>CHBr); 3.62 (1H, d, J = 13.5 Hz, NCH<sub>a</sub>H<sub>b</sub>Ph); 3.69 (1H, d, J = 13.5 Hz, NCH<sub>a</sub>H<sub>b</sub>Ph); 4.09 (1H, tt, J = 11.5 Hz, 4.9 Hz, CHBr); 7.24-7.37 (5H, m, 5 × CH<sub>ar</sub>). <sup>19</sup>F NMR (CDCl<sub>3</sub>): δ -97.0 (1F, d, J = 245.3 Hz, CF<sub>2</sub>); -100.6 (1F, dtt, J = 245.3 Hz, 30.0 Hz, 11.5 Hz, CF<sub>2</sub>). <sup>13</sup>C NMR (CDCl<sub>3</sub>): δ 40.1 (d, J = 11.5 Hz, CHBr); 43.3 (t, J = 24.2 Hz, CH<sub>2</sub>); 56.9 (dd, J = 30.6 Hz, 24.8 Hz, NCH<sub>2</sub>CF<sub>2</sub>); 59.7 (NCH<sub>2</sub>CHBr); 60.9 (NCH<sub>2</sub>Ph); 119.2 (t, J = 244.6 Hz, CF<sub>2</sub>); 127.6 (CH<sub>ar</sub>); 128.5 (2 × CH<sub>ar</sub>); 128.8 (2 × CH<sub>ar</sub>); 136.5 (C<sub>ar</sub>). IR (ATR, cm<sup>-1</sup>): ν = 3062; 3029; 2920; 2818; 1603; 1494; 1454; 1381; 1348; 1308; 1287; 1181; 1167; 1114; 1073; 1009; 981; 956; 913; 890; 829; 742; 722; 698. MS (ES+) *m/z* (%): 210 (M-Br, 100); 290/292 (M+H<sup>+</sup>, 60). Anal. Calcd. for C<sub>12</sub>H<sub>14</sub>BrF<sub>2</sub>N: C, 49.67; H, 4.86; N, 4.83. Found: C, 49.45; H, 4.93; N, 4.96.

**1-Benzyl-3,3-difluoro-5-iodopiperidine 8c.** To a solution of 200 mg (0.95 mmol, 1 equiv) of *N*-benzyl-*N*-(2,2-difluoropent-4-enyl)amine **6c** in 5 mL of dichloromethane was added 213 mg (0.95 mmol, 1 equiv) of *N*-iodosuccinimide. After the mixture had been stirred for 2 hours at room temperature the mixture was poured into 20 mL of water and was extracted twice with 20 mL of dichloromethane. The combined organic layers were washed with aq. NaHSO<sub>3</sub> and dried over MgSO<sub>4</sub> and the solvent was evaporated in vacuo. The residue was purified by flash chromatography (hexane/EtOAc 9:1, R<sub>f</sub> = 0.51) to yield 262 mg of pure 1-benzyl-3,3-difluoro-5-iodopiperidine **8c** (0.78 mmol, 82% yield) as a yellow oil. <sup>1</sup>H NMR (CDCl<sub>3</sub>): 2.20 (1H, dtd, J = 30.3 Hz, 11.8 Hz, 4.6 Hz, CH<sub>a</sub>H<sub>b</sub>); 2.39 (1H, ddd, J = 30.3 Hz, 11.8 Hz, 1.7 Hz, NCH<sub>a</sub>CH<sub>b</sub>CF<sub>2</sub>); 2.50 (1H, t, J = 11.8 Hz, NCH<sub>a</sub>H<sub>b</sub>CHI); 2.80 (1H, t, J = 11.8 Hz, CH<sub>a</sub>H<sub>b</sub>); 3.12 (1H, t, J = 11.8 Hz, NCH<sub>a</sub>H<sub>b</sub>CF<sub>2</sub>); 3.25 (1H, d, J = 11.8 Hz, NCH<sub>a</sub>H<sub>b</sub>CHI); 3.62 (1H, d, J = 13.5 Hz, NCH<sub>a</sub>H<sub>b</sub>Ph); 3.71 (1H, d, J = 13.5 Hz, NCH<sub>a</sub>H<sub>b</sub>Ph); 4.16 (1H, tt, J = 11.8 Hz, 4.6 Hz, CHI); 7.24-7.38 (5H, m, 5 × CH<sub>ar</sub>). <sup>19</sup>F NMR (CDCl<sub>3</sub>): δ -96.4 (1F, d, J = 243.5 Hz, CF<sub>2</sub>); -101.8 (1F, dtt, J = 243.5 Hz, 30.3 Hz, 11.8 Hz, CF<sub>2</sub>). <sup>13</sup>C NMR (CDCl<sub>3</sub>): δ 15.4 (d, J = 10.4 Hz, CHI); 45.2 (t, J = 24.2 Hz, CH<sub>2</sub>); 57.0 (dd, J = 30.0 Hz, 24.2 Hz, NCH<sub>2</sub>CF<sub>2</sub>); 60.7 (NCH<sub>2</sub>Ph); 61.5 (NCH<sub>2</sub>CHI); 119.0 (t, J = 245.8 Hz, CF<sub>2</sub>); 127.6 (CH<sub>ar</sub>); 128.5 (2 × CH<sub>ar</sub>); 128.8 (2 × CH<sub>ar</sub>); 136.5 (C<sub>ar</sub>). IR (ATR, cm<sup>-1</sup>): ν = 3061; 3028; 2920; 2816; 1602; 1494; 1454; 1435; 1380; 1344; 1308; 1288; 1187; 1151; 1110; 1069; 1007; 980; 952; 912; 886; 824; 740; 697. MS (ES+) *m/z* (%): 210 (M-I, 100); 338 (M+H<sup>+</sup>, 50). Anal. Calcd. for C<sub>12</sub>H<sub>14</sub>F<sub>2</sub>IN: C, 42.75; H, 4.19; N, 4.15. Found: C, 42.53; H, 4.23; N, 4.13.

**5-Azido-1-benzyl-3,3-difluoropiperidine 9.** To a solution of 1.00 g (2.97 mmol) of 1-benzyl-3,3-difluoro-5-iodopiperidine **8c** in 20 mL of DMF was added 0.19 g (2.97 mmol, 1 equiv) of sodium azide and the mixture was stirred at room temperature for 24 hours. The mixture was poured into 30 mL of water and extracted with 3 x 30 mL of Et<sub>2</sub>O. The combined organic phases were washed with brine (2 x 30 mL), dried (MgSO<sub>4</sub>), concentrated and purified via flash chromatography (hexane/EtOAc 99:1, R<sub>f</sub> = 0.08) to afford 0.53 g of 5-azido-1-benzyl-3,3-difluoropiperidine **9** (2.11 mmol, 71% yield) as a colorless oil. <sup>1</sup>H NMR (CDCl<sub>3</sub>): 1.76 (1H, dtd, J = 24.0 Hz, 13.6 Hz, 11.5 Hz, CH<sub>a</sub>H<sub>b</sub>); 2.17 (1H, t, J = 11.5 Hz, NCH<sub>a</sub>H<sub>b</sub>CHN<sub>3</sub>); 2.39 (1H, ddd, J = 24.0 Hz, 11.5 Hz, 6.9 Hz, NCH<sub>a</sub>CH<sub>b</sub>CF<sub>2</sub>); 2.39 (1H, t, J = 11.5 Hz, CH<sub>a</sub>H<sub>b</sub>); 2.94 (1H, t, J = 11.5 Hz, NCH<sub>a</sub>H<sub>b</sub>CF<sub>2</sub>); 2.97 (1H, d, J = 11.5 Hz, NCH<sub>a</sub>H<sub>b</sub>CHN<sub>3</sub>); 3.62 (1H, d, J = 13.2 Hz, NCH<sub>a</sub>H<sub>b</sub>Ph); 3.67 (1H, d, J = 13.2 Hz, NCH<sub>a</sub>H<sub>b</sub>Ph); 3.71 (1H, tt, J = 11.5 Hz, 4.5 Hz, CHN<sub>3</sub>); 7.24-7.38 (5H, m, 5 × CH<sub>ar</sub>). <sup>19</sup>F NMR (CDCl<sub>3</sub>): δ -97.7 (1F, d × quintet, J = 246.0 Hz, 6.9 Hz, CF<sub>a</sub>F<sub>b</sub>); -99.0 (1F, dtt, J = 246.0 Hz, 24.0 Hz, 11.5 Hz, CF<sub>a</sub>F<sub>b</sub>). <sup>13</sup>C NMR (CDCl<sub>3</sub>): δ 37.8 (t, J = 23.7 Hz, CH<sub>2</sub>); 54.3 (d, J = 10.4

Hz, CHN<sub>3</sub>); 55.9 (NCH<sub>2</sub>CHN<sub>3</sub>); 57.3 (dd, J = 29.46 Hz, 26.0 Hz, NCH<sub>2</sub>CF<sub>2</sub>); 61.4 (NCH<sub>2</sub>Ph); 119.4 (t, J = 242.3 Hz, CF<sub>2</sub>); 127.6 (CH<sub>ar</sub>); 128.5 (2 × CH<sub>ar</sub>); 128.9 (2 × CH<sub>ar</sub>); 136.4 (C<sub>ar</sub>). IR (NaCl, cm<sup>-1</sup>): ν = 3331; 3029; 2922; 2819; 2102 (N<sub>3</sub>); 1603; 1494; 1453; 1382; 1305; 1281; 1256; 1189; 1172; 1103; 1085; 1012; 976; 919; 825; 742; 699. GC-MS (EI): *m/z* (%): 252 (M<sup>+</sup>, 1); 224 (M<sup>+</sup>-N<sub>2</sub>, 3); 204 (8); 196 (43); 175 (M<sup>+</sup>-C<sub>6</sub>H<sub>5</sub>, 4); 132 (4); 120 (31); 119 (30); 113 (4); 106 (20); 91 (C<sub>7</sub>H<sub>7</sub><sup>+</sup>, 100); 77 (C<sub>6</sub>H<sub>5</sub><sup>+</sup>, 4); 65 (16); 55 (6); 42 (10). MS (ES<sup>+</sup>) *m/z* (%): 253 (M+H<sup>+</sup>, 100).

**5-Amino-1-benzyl-3,3-difluoropiperidine 10.** To a solution of 0.75 g (2.98 mmol) of 5-azido-1-benzyl-3,3-difluoropiperidine **9** in 25 mL of MeOH was added 75 mg (10 wt%) of Pd/C and the mixture was presaturated with H<sub>2</sub> and stirred under H<sub>2</sub> at 1.2 bar for 48 h at room temperature. The mixture was filtered through Celite and the solvent was evaporated. The crude oil was purified via flash chromatography (hexane/EtOAc 3:7, R<sub>f</sub> = 0.07) to afford 0.67 g of 5-amino-1-benzyl-3,3-difluoropiperidine **10** (2.95 mmol, 99% yield). Yellow oil. <sup>1</sup>H NMR (CDCl<sub>3</sub>): δ 1.56-1.82 (3H, m, CH<sub>a</sub>H<sub>b</sub> and NH<sub>2</sub>); 2.08-2.20 (1H, m, NCH<sub>a</sub>H<sub>b</sub>); 2.20-2.28 (1H, m, CH<sub>a</sub>H<sub>b</sub>); 2.41-2.61 (1H, m, NCH<sub>a</sub>H<sub>b</sub>CF<sub>2</sub>); 2.63-2.71 (1H, m, NCH<sub>a</sub>H<sub>b</sub>); 2.72-2.81 (1H, m, NCH<sub>a</sub>H<sub>b</sub>CF<sub>2</sub>); 3.12-3.22 (1H, m, NCH); 3.60 (2H, s, NCH<sub>2</sub>Ph); 7.26-7.37 (5H, m, 5 × CH<sub>ar</sub>). <sup>19</sup>F NMR (CDCl<sub>3</sub>): δ -96.0 (1F, d, J = 245.3 Hz, CF<sub>a</sub>F<sub>b</sub>); -97.2 (1F, d, J = 245.3 Hz, CF<sub>a</sub>F<sub>b</sub>). <sup>13</sup>C NMR (CDCl<sub>3</sub>): δ 41.1 (t, J = 21.9 Hz, CH<sub>2</sub>); 45.5 (t, J = 5.2 Hz, NCH); 57.8 (t, J = 27.7 Hz, NCH<sub>2</sub>CF<sub>2</sub>); 60.2 (NCH<sub>2</sub>); 61.5 (NCH<sub>2</sub>Ph); 120.3 (t, J = 241.7 Hz, CF<sub>2</sub>); 127.2 (CH<sub>ar</sub>); 128.2 (2 × CH<sub>ar</sub>); 128.7 (2 × CH<sub>ar</sub>); 136.9 (C<sub>ar</sub>). IR (ATR, cm<sup>-1</sup>): ν = 3294 (NH); 3062; 3029; 2954; 2814; 1654; 1560; 1495; 1454; 1438; 1386; 1294; 1174; 1117; 1093; 1062; 1028; 998; 919; 827; 745; 700. MS (ES<sup>+</sup>) *m/z* (%): 227 (M+H<sup>+</sup>, 100). Anal. Calcd. for C<sub>12</sub>H<sub>16</sub>F<sub>2</sub>N<sub>2</sub>: C, 63.70; H, 7.13; N, 12.38. Found: C, 63.59; H, 7.36; N, 12.42.

**tert-Butyl 5-chloro-3,3-difluoropiperidine-1-carboxylate 11.** To a solution of 3.50 g (14.26 mmol) of 1-benzyl-5-chloro-3,3-difluoropiperidine **8a** in 20 mL of EtOAc were added 3.42 g (15.69 mmol, 1.1 equiv) of di-*tert*-butyl dicarbonate and 1.40 g (40 wt%) of Pd/C. The mixture was stirred under H<sub>2</sub> at 4.8 bar at room temperature during 15 hours. The mixture was filtered, evaporated and purified via flash chromatography (hexane/EtOAc 95:5, R<sub>f</sub> = 0.16) to afford 3.60 g of *tert*-butyl 5-chloro-3,3-difluoropiperidine-1-carboxylate **11** (14.12 mmol, 99% yield). M.p. = 52.9°C (Et<sub>2</sub>O). White crystals. <sup>1</sup>H NMR (CDCl<sub>3</sub>): 1.39 (9H, s, 3 × CH<sub>3</sub>); 1.98 (1H, dtd, J = 30.8 Hz, 11.8 Hz, 4.7 Hz, CH<sub>a</sub>H<sub>b</sub>); 2.57-2.68 (1H, m, CH<sub>a</sub>H<sub>b</sub>); 2.68-2.89 (1H, m, NCH<sub>a</sub>H<sub>b</sub>); 2.98 (1H, dd, J = 29.4 Hz, 14.0 Hz, NCH<sub>a</sub>CH<sub>b</sub>CF<sub>2</sub>); 3.89 (1H, tt, J = 11.8 Hz, 4.7 Hz, CHCl); 4.08-4.46 (2H, m, NCH<sub>a</sub>H<sub>b</sub>CF<sub>2</sub> and NCH<sub>a</sub>H<sub>b</sub>). <sup>19</sup>F NMR (CDCl<sub>3</sub>): δ -100.2 and -100.6 (1F, d, J = 247.3 Hz, CF<sub>a</sub>F<sub>b</sub>, 2 rotamers); -104.0 and -104.7 (1F, d, J = 247.3 Hz, CF<sub>a</sub>F<sub>b</sub>, 2 rotamers). <sup>13</sup>C NMR (CDCl<sub>3</sub>): δ 28.0 (3 × CH<sub>3</sub>); 42.6 (t, J = 24.2 Hz, CH<sub>2</sub>); 48.0 (t, J = 29.4 Hz, NCH<sub>2</sub>CF<sub>2</sub>); 48.9 (d, J = 4.6 Hz, CHCl); 49.3 (NCH<sub>2</sub>); 81.2 (OC<sub>q</sub>); 118.2 (t, J = 246.9 Hz, CF<sub>2</sub>); 153.8 (C=O). IR (ATR, cm<sup>-1</sup>): ν = 2979; 2936; 1699 (C=O); 1456; 1415; 1368; 1300; 1259; 1249; 1218; 1156; 1117; 1090; 1004; 888; 832; 765. GC-MS (EI): *m/z* (%): 255 (M<sup>+</sup>, 1); 240 (M<sup>+</sup>-CH<sub>3</sub>, 1); 200 (M<sup>+</sup>-CHC(CH<sub>3</sub>)<sub>2</sub>, 10); 182 (M<sup>+</sup>-*Or*Bu, 34); 155 (M<sup>+</sup>-Boc+H, 17); 120 (M<sup>+</sup>-Boc-Cl, 13); 57 (<sup>+</sup>C(CH<sub>3</sub>)<sub>3</sub>, 100); 41 (19). MS (ES<sup>+</sup>) *m/z* (%): 241/243 (100); 200/202 (M<sup>+</sup>-C(CH<sub>3</sub>)<sub>3</sub>+2H<sup>+</sup>, 70). Anal. Calcd. for C<sub>10</sub>H<sub>16</sub>ClF<sub>2</sub>NO<sub>2</sub>: C, 46.97; H, 6.31; N, 5.48. Found: C, 46.79; H, 6.42; N, 5.55.

**3,3-Difluoro-5-iodomethylidihydrofuran-2(3H)-one 13.** To a solution of 0.41 g (3.02 mmol, 1 equiv) of 2,2-difluoro-4-pentenoic acid **3** in 10 mL of acetonitrile in a darkened flask was added 2.00 g (7.86 mmol, 2.6 equiv) of iodine at 0°C under N<sub>2</sub> atmosphere. The reaction mixture was then stirred for 15 hours at room temperature and quenched by the addition of a saturated Na<sub>2</sub>S<sub>2</sub>O<sub>3</sub> solution and a saturated NaHCO<sub>3</sub> solution (1:1). The aqueous layer was

extracted with dichloromethane and the combined organic extracts were dried over  $\text{MgSO}_4$ , filtered and the solvent was removed in vacuo. The crude lactone was purified by flash chromatography (hexane/EtOAc 6:4,  $R_f = 0.31$ ) to yield 0.71 g of 3,3-difluoro-5-iodomethyl-dihydrofuran-2(3*H*)-one **13** (2.72 mmol, 90% yield) as a yellow oil.  $^1\text{H}$  NMR ( $\text{CDCl}_3$ ):  $\delta$  2.51 (1H, dtd,  $J = 20.4$  Hz, 15.0 Hz, 7.2 Hz,  $\text{CH}_a\text{H}_b$ ); 2.96 (1H, tt,  $J = 15.0$  Hz, 7.5 Hz,  $\text{CH}_a\text{H}_b$ ); 3.32 (1H, dd,  $J = 10.5$  Hz, 7.7 Hz,  $\text{CH}_a\text{H}_b\text{I}$ ); 3.32 (1H, dd,  $J = 10.5$  Hz, 4.4 Hz,  $\text{CH}_a\text{H}_b\text{I}$ ); 4.62-4.72 (1H, m, OCH).  $^{19}\text{F}$  NMR ( $\text{CDCl}_3$ ):  $\delta$  -104.8 (1F, ddd,  $J = 281.0$  Hz, 20.4 Hz, 15.0 Hz,  $\text{CF}_a\text{F}_b$ ); -106.8 (1F, ddd,  $J = 281.0$  Hz, 15.0 Hz, 7.5 Hz,  $\text{CF}_a\text{F}_b$ ).  $^{13}\text{C}$  NMR ( $\text{CDCl}_3$ ):  $\delta$  5.2 (d,  $J = 2.3$  Hz,  $\text{CH}_2\text{I}$ ); 37.3 (t,  $J = 21.9$  Hz,  $\text{CH}_2$ ); 74.5 (dd,  $J = 5.6$  Hz, 2.3 Hz, OCH); 115.5 (dd,  $J = 256.1$  Hz, 251.5 Hz,  $\text{CF}_2$ ); 164.5 (t,  $J = 33.5$  Hz, C=O). IR (ATR,  $\text{cm}^{-1}$ ):  $\nu = 3611$ ; 3025; 2962; 1804 (C=O); 1429; 1361; 1314; 1262; 1220; 1171; 1096; 1045; 992; 976; 937; 864; 822; 742. GC-MS (EI):  $m/z$  (%): 262/263 ( $\text{M}^+$ , 69/3); 169 (3); 154 (4); 142 (6); 141 (9); 127 (13); 116 (4); 91 ( $\text{M}^+ - \text{CO}_2 - \text{I}$ , 100); 71 (24); 65 (11); 64 (16); 51 (17); 43 (17). Anal. Calcd. for  $\text{C}_5\text{H}_5\text{F}_2\text{IO}_2$ : C, 22.92; H, 1.92. Found: C, 22.76; H, 1.98.

**5-Azidomethyl-3,3-difluorodihydrofuran-2(3*H*)-one 14.** To a solution of 1.22 g (4.66 mmol, 1 equiv) of 3,3-difluoro-5-iodomethyl-dihydrofuran-2(3*H*)-one **13** in 10 mL of DMSO was added 0.36 g (5.59 mmol, 1.2 equiv) of  $\text{NaN}_3$  and the mixture was stirred for 24 hours at room temperature. After completion of the reaction, the mixture was poured into 30 mL of water and extracted with  $3 \times 30$  mL of diethyl ether. The combined organic phases were washed with brine and dried over  $\text{MgSO}_4$ . After evaporation of the solvent in vacuo the residue was purified via flash chromatography (hexane/EtOAc 7:3,  $R_f = 0.15$ ) to yield 0.57 g of 5-azidomethyl-3,3-difluorodihydrofuran-2(3*H*)-one **14** (3.22 mmol, 69% yield) as a yellow oil.  $^1\text{H}$  NMR ( $\text{CDCl}_3$ ):  $\delta$  2.62 (1H, dtd,  $J = 22.0$  Hz, 15.3 Hz, 7.5 Hz,  $\text{CH}_a\text{H}_b$ ); 2.84 (1H, tt,  $J = 15.3$  Hz, 7.5 Hz,  $\text{CH}_a\text{H}_b$ ); 3.55 (1H, dd,  $J = 13.8$  Hz, 5.0 Hz,  $\text{CH}_a\text{H}_b\text{N}_3$ ); 3.77 (1H, dd,  $J = 13.8$  Hz, 3.3 Hz,  $\text{CH}_a\text{H}_b\text{N}_3$ ); 4.78-4.87 (1H, m, OCH).  $^{19}\text{F}$  NMR ( $\text{CDCl}_3$ ):  $\delta$  -104.4 (1F, ddd,  $J = 280.5$  Hz, 22.0 Hz, 15.3 Hz,  $\text{CF}_a\text{F}_b$ ); -106.8 (1F, ddd,  $J = 280.5$  Hz, 15.3 Hz, 7.5 Hz,  $\text{CF}_a\text{F}_b$ ).  $^{13}\text{C}$  NMR ( $\text{CDCl}_3$ ):  $\delta$  33.5 (t,  $J = 23.1$  Hz,  $\text{CH}_2$ ); 52.3 ( $\text{CH}_2\text{N}_3$ ); 74.3 (dd,  $J = 6.9$  Hz, 2.3 Hz, OCH); 115.2 (dd,  $J = 256.7$  Hz, 249.8 Hz,  $\text{CF}_2$ ); 164.6 (t,  $J = 32.9$  Hz, C=O). IR (ATR,  $\text{cm}^{-1}$ ):  $\nu = 3613$ ; 2922; 2851; 2107 ( $\text{N}_3$ ); 1806 (C=O); 1669; 1434; 1318; 1288; 1256; 1232; 1210; 1131; 1090; 1029; 960; 924; 903; 863; 742. GC-MS (EI):  $m/z$  (%): 177 ( $\text{M}^+$ , 3); 122 ( $\text{M}^+ - \text{CH}_2\text{N}_3 + \text{H}^+$ , 80); 93 ( $\text{M}^+ - \text{CO}_2 - \text{N}_3 + 2\text{H}^+$ , 44); 77 ( $\text{M}^+ - \text{CH}_2\text{N}_3 - \text{CO}_2$ , 42); 73 (13); 65 ( $\text{CF}_2\text{CH}_2$ , 100); 64 (26); 51 (14); 45 (21); 41 (17).

**3,3-Difluoro-5-hydroxy-2-piperidinone 15.** To a solution of 0.57 g (3.22 mmol, 1 equiv) of 5-azidomethyl-3,3-difluorodihydrofuran-2(3*H*)-one **14** in 30 mL of ethanol in a pressure vessel was added 114 mg (20 wt%) of 10% Pd/C. The mixture was stirred under  $\text{H}_2$  pressure (4.8 bar) for 24 hours. The solution was filtered through a Celite plug to remove the catalyst, and the catalyst was washed twice with 10 mL of hot ethanol. The filtrates were combined and concentrated in vacuo. The residue was purified via flash chromatography ( $\text{CHCl}_3/\text{MeOH}$  4:1,  $R_f = 0.23$ ) to yield 0.29 g of 3,3-difluoro-5-hydroxy-2-piperidinone **15** (1.93 mmol, 60% yield) as white crystals. M.p. = 136.2°C ( $\text{Et}_2\text{O}$ ).  $^1\text{H}$  NMR ( $\text{CD}_3\text{OD}$ ):  $\delta$  2.33 (1H, dtd,  $J = 19.3$  Hz, 14.1 Hz, 8.3 Hz,  $\text{CH}_a\text{H}_b$ ); 2.51 (1H, qd,  $J = 14.1$  Hz, 3.3 Hz,  $\text{CH}_a\text{H}_b$ ); 3.18 (1H, dd,  $J = 12.6$  Hz, 6.3 Hz,  $\text{NCH}_a\text{H}_b$ ); 3.43 (1H, dd,  $J = 12.6$  Hz, 3.9 Hz,  $\text{NCH}_a\text{H}_b$ ); 4.07-4.18 (1H, m, OCH).  $^{19}\text{F}$  NMR ( $\text{dmsO}-d_6$ ):  $\delta$  -94.0 (1F, dt,  $J = 283.2$  Hz, 19.3 Hz,  $\text{CF}_a\text{F}_b$ ); -96.6 (1F, dtd,  $J = 283.2$  Hz, 13.2 Hz, 3.9 Hz,  $\text{CF}_a\text{F}_b$ ).  $^{13}\text{C}$  NMR ( $\text{CD}_3\text{OD}$ ):  $\delta$  39.5 (t,  $J = 21.3$  Hz,  $\text{CH}_2$ ); 47.5 ( $\text{NCH}_2$ ); 61.7 (t,  $J = 5.8$  Hz, OCH); 112.1 (dd,  $J = 246.9$  Hz, 241.1 Hz,  $\text{CF}_2$ ); 163.4 (t,  $J = 30.0$  Hz, C=O). IR (ATR,  $\text{cm}^{-1}$ ):  $\nu = 3450$ ; 3357 (NH); 3232 (OH); 2906; 2491; 2361; 1693; 1682 (C=O); 1424; 1360; 1327; 1228; 1193; 1148; 1114; 1020; 980;

938; 874; 820; 696. MS (ES+)  $m/z$  (%): 169 (M+NH<sub>4</sub><sup>+</sup>, 100). Anal. Calcd. for C<sub>5</sub>H<sub>7</sub>F<sub>2</sub>NO<sub>2</sub>: C, 39.74; H, 4.67; N, 9.27. Found: C, 39.51; H, 4.34; N, 8.90.

**Benzyl 3,3-difluoro-5-hydroxypiperidine-1-carboxylate 16.** A solution of 0.22 g (1.46 mmol, 1 equiv) of 3,3-difluoro-5-hydroxy-2-piperidinone **15** in 6 mL of dry THF at 0°C under N<sub>2</sub> atmosphere was reacted with 6.2 mL (6.2 mmol, 4.2 equiv) 1M BH<sub>3</sub>.THF complex. After all the borane was added, the solution was heated to 60°C for 1.5 hours. The reaction was cooled and then quenched by the cautious addition of methanol. The solvent was removed under reduced pressure to give a yellow residue of crude 5-hydroxypiperidine that was immediately dissolved in 2.8 mL of water containing 0.32 g (3.8 mmol, 2.6 equiv) of NaHCO<sub>3</sub>. A solution of 0.68 g (4 mmol, 2.7 equiv) of carbobenzyloxy chloride in 2 mL of toluene was added dropwise, and after adjusting the pH to 8 with 50% NaOH, the reaction was stirred overnight at room temperature. The solution was diluted with 12 mL of diethyl ether and the organic layer was washed with water and brine and dried over MgSO<sub>4</sub>. After filtration and evaporation of the solvents in vacuo, the crude material was purified via flash chromatography (hexane/EtOAc 4:1, R<sub>f</sub> = 0.12) to yield 0.26 g of benzyl 3,3-difluoro-5-hydroxypiperidine-1-carboxylate **16** (0.95 mmol, 65% yield) as a colorless oil. <sup>1</sup>H NMR (CDCl<sub>3</sub>): δ 1.87-2.12 (1H, m, CH<sub>a</sub>H<sub>b</sub>); 2.27-2.48 (1H, m, CH<sub>a</sub>H<sub>b</sub>); 2.89 (1H, s(broad), OH); 3.10-3.24 (1H, m, NCH<sub>a</sub>H<sub>b</sub>); 3.48-3.68 (1H, m, NCH<sub>a</sub>H<sub>b</sub>); 3.70-3.95 (2H, m, NCH<sub>2</sub>); 3.96-4.05 (1H, m, OCH); 5.15 (2H, s, OCH<sub>2</sub>); 7.31-7.39 (5H, m, 5 × CH<sub>ar</sub>). <sup>19</sup>F NMR (CDCl<sub>3</sub>): δ -98.7 to -101.5 (2F, m, CF<sub>2</sub>). <sup>13</sup>C NMR (CDCl<sub>3</sub>): δ 40.2 (t, J = 22.5 Hz, CH<sub>2</sub>); 48.4-49.7 (m, NCH<sub>2</sub>); 49.5 (NCH<sub>2</sub>); 63.4-64.3 (m, OCH); 67.9 (OCH<sub>2</sub>); 118.9 (t, J = 244.6 Hz, CF<sub>2</sub>); 127.8 (2 × CH<sub>ar</sub>); 128.2 (CH<sub>ar</sub>); 128.5 (2 × CH<sub>ar</sub>); 135.9 (C<sub>ar</sub>); 155.6 (C=O). IR (ATR, cm<sup>-1</sup>): ν = 3424 (OH); 2923; 2360; 1682 (C=O); 1466; 1432; 1364; 1314; 1257; 1215; 1177; 1114; 1095; 1052; 1002; 975; 943; 900; 815; 766; 738; 698. MS (ES+)  $m/z$  (%): 270 (M-H<sup>+</sup>, 100). Anal. Calcd. for C<sub>13</sub>H<sub>15</sub>F<sub>2</sub>NO<sub>3</sub>: C, 57.56; H, 5.57; N, 5.16. Found: C, 57.33; H, 5.68; N, 5.10.

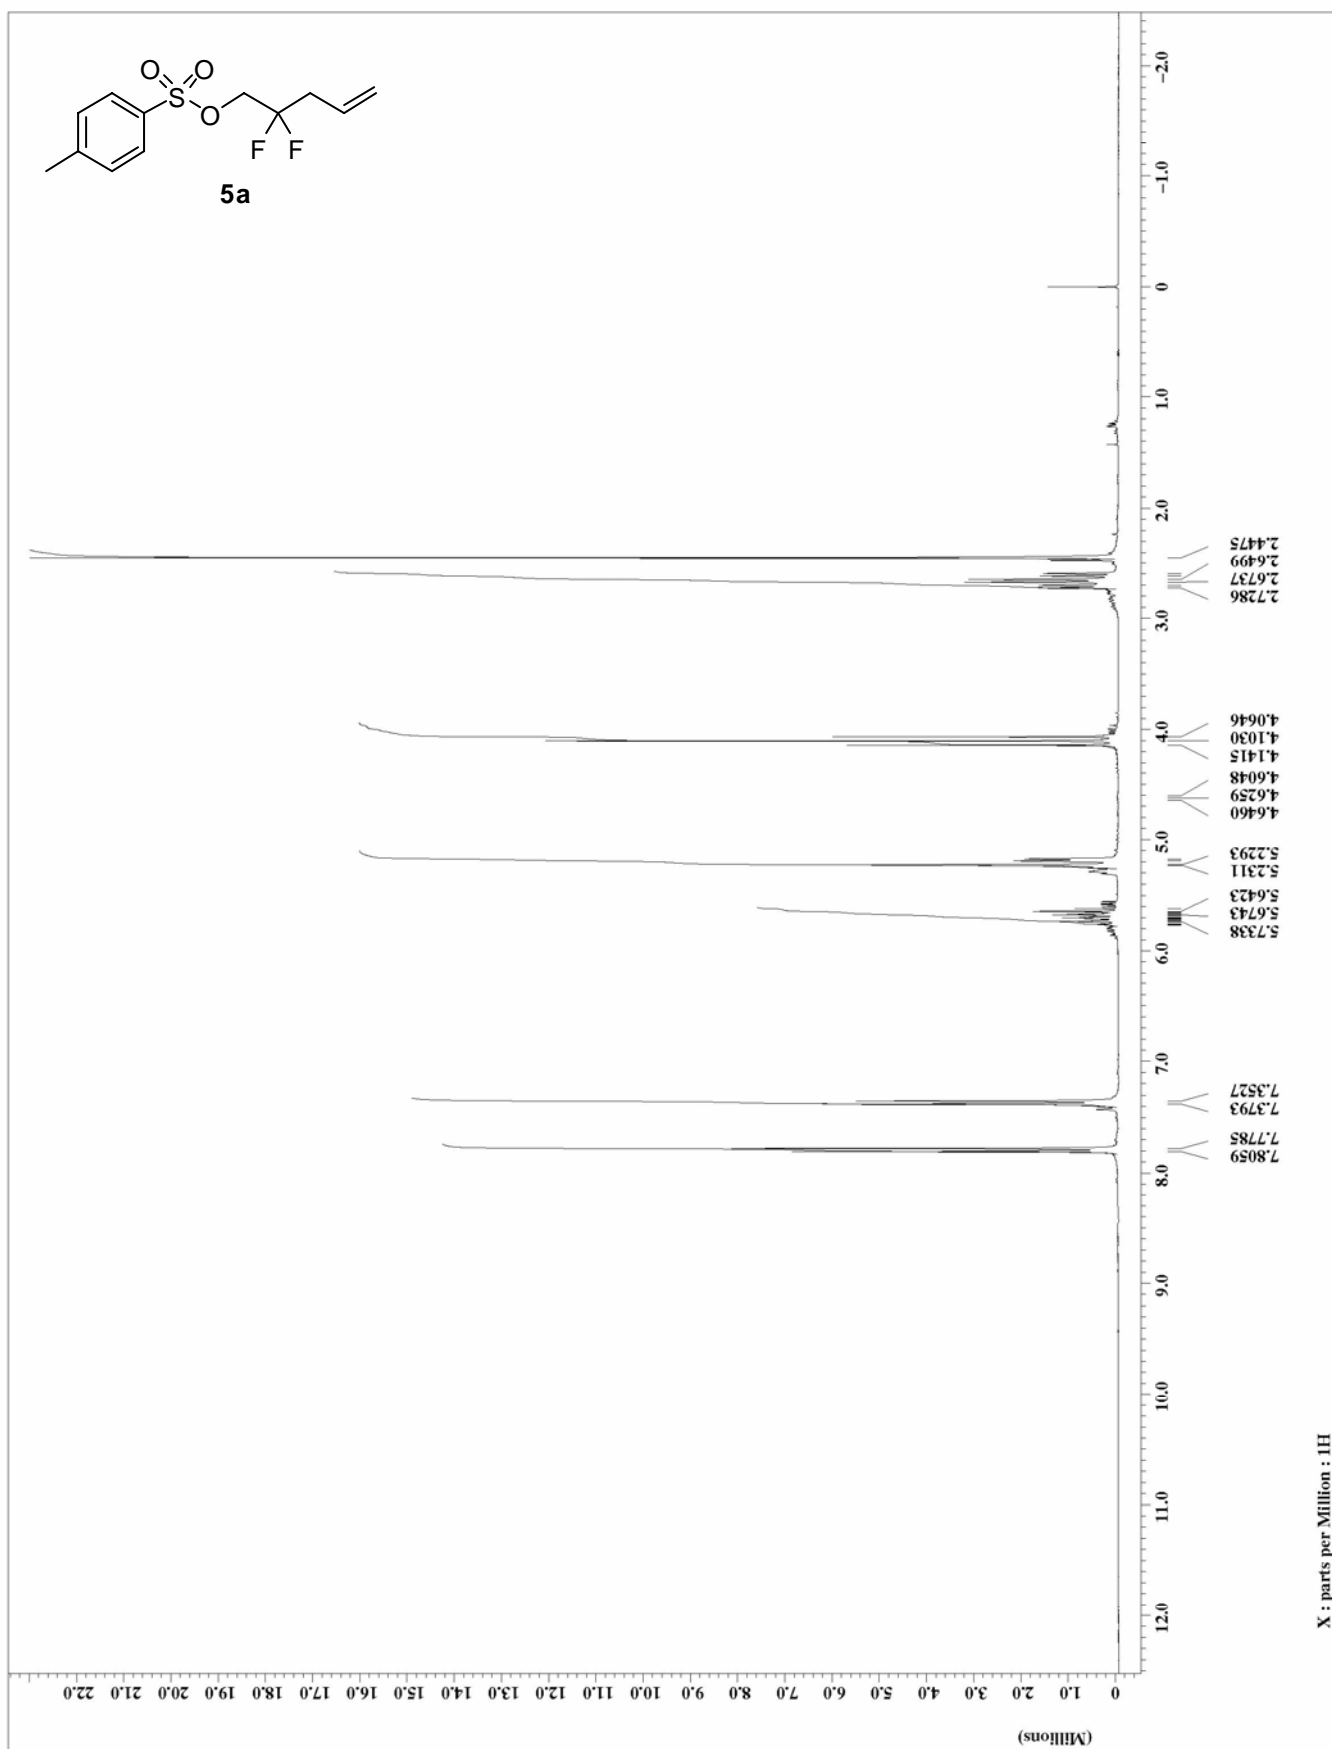



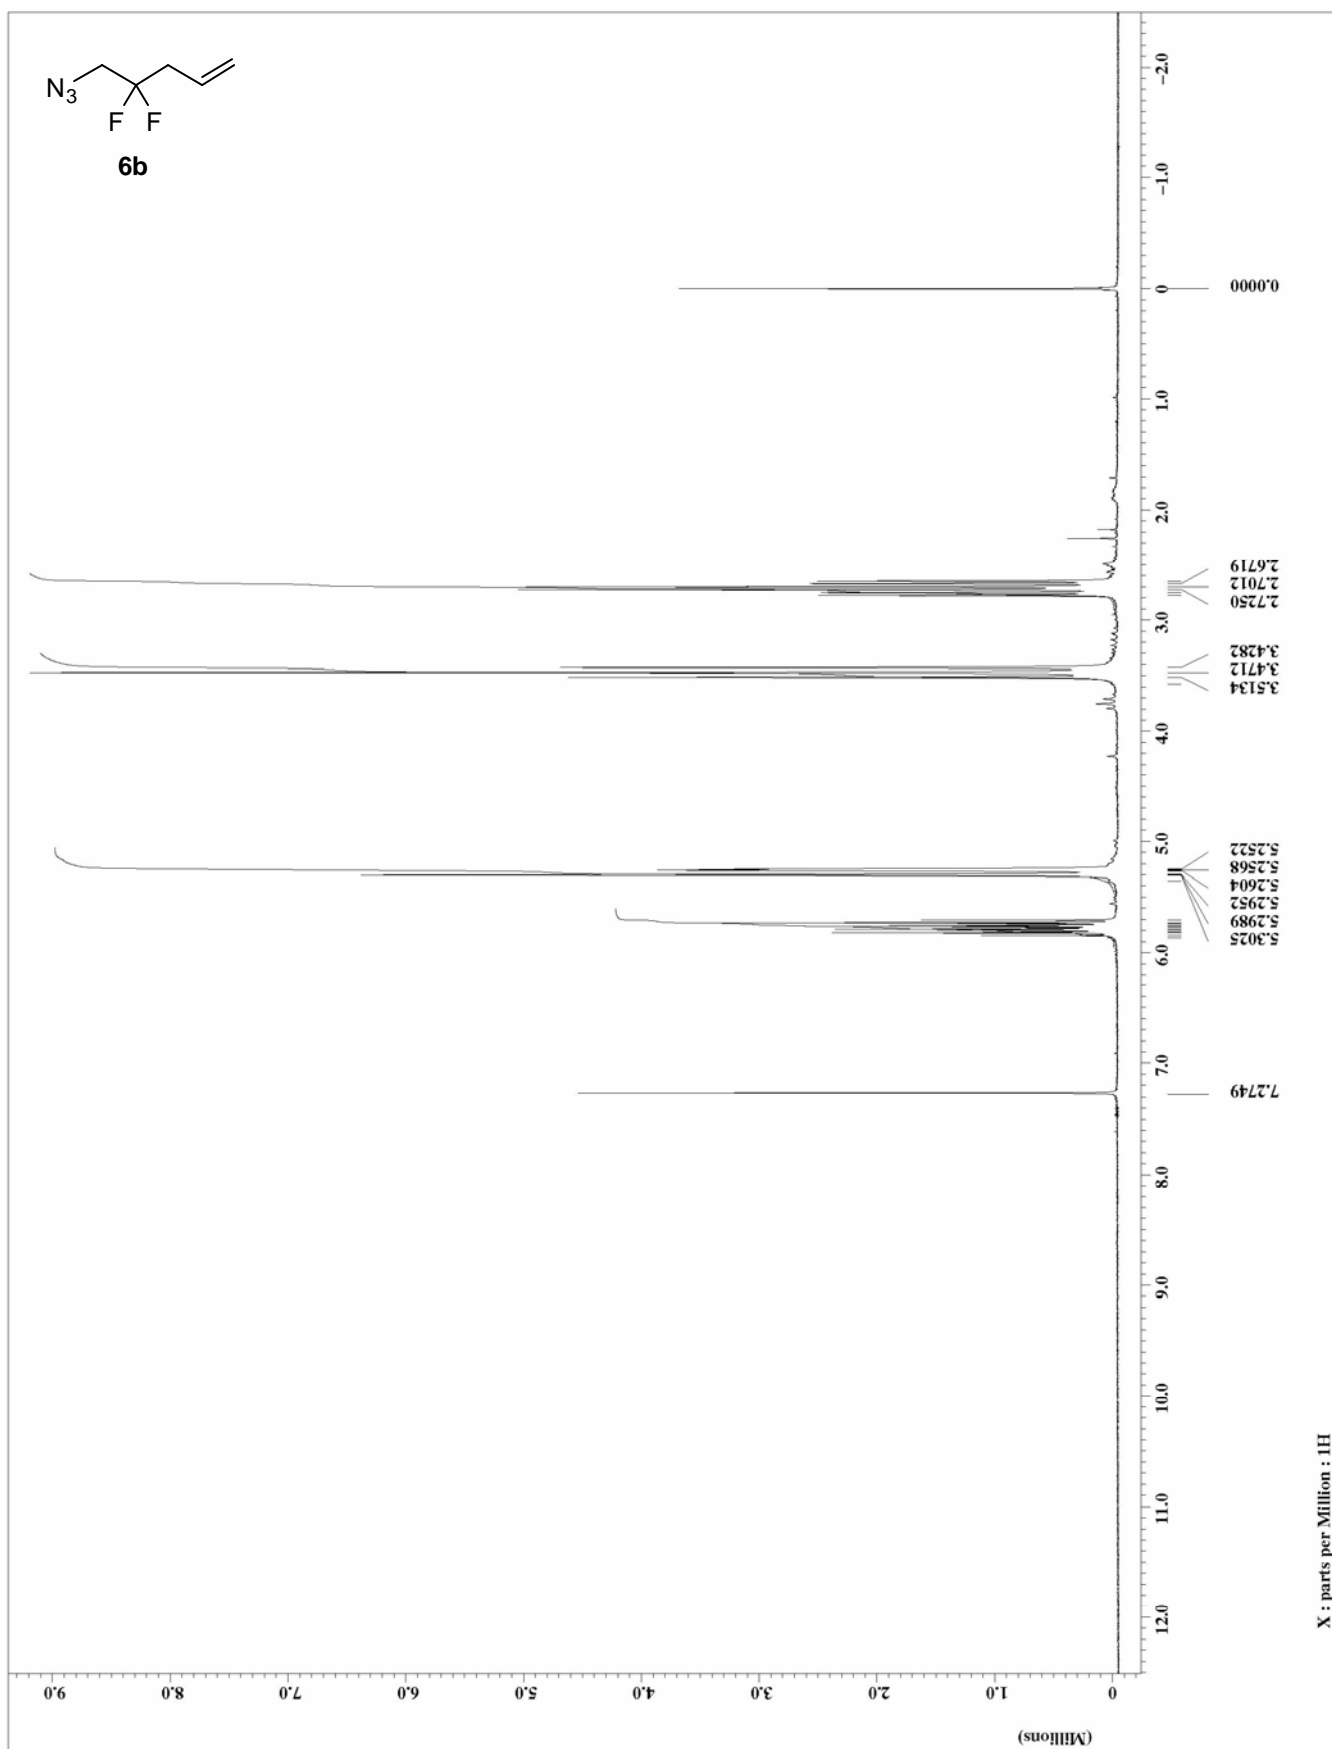

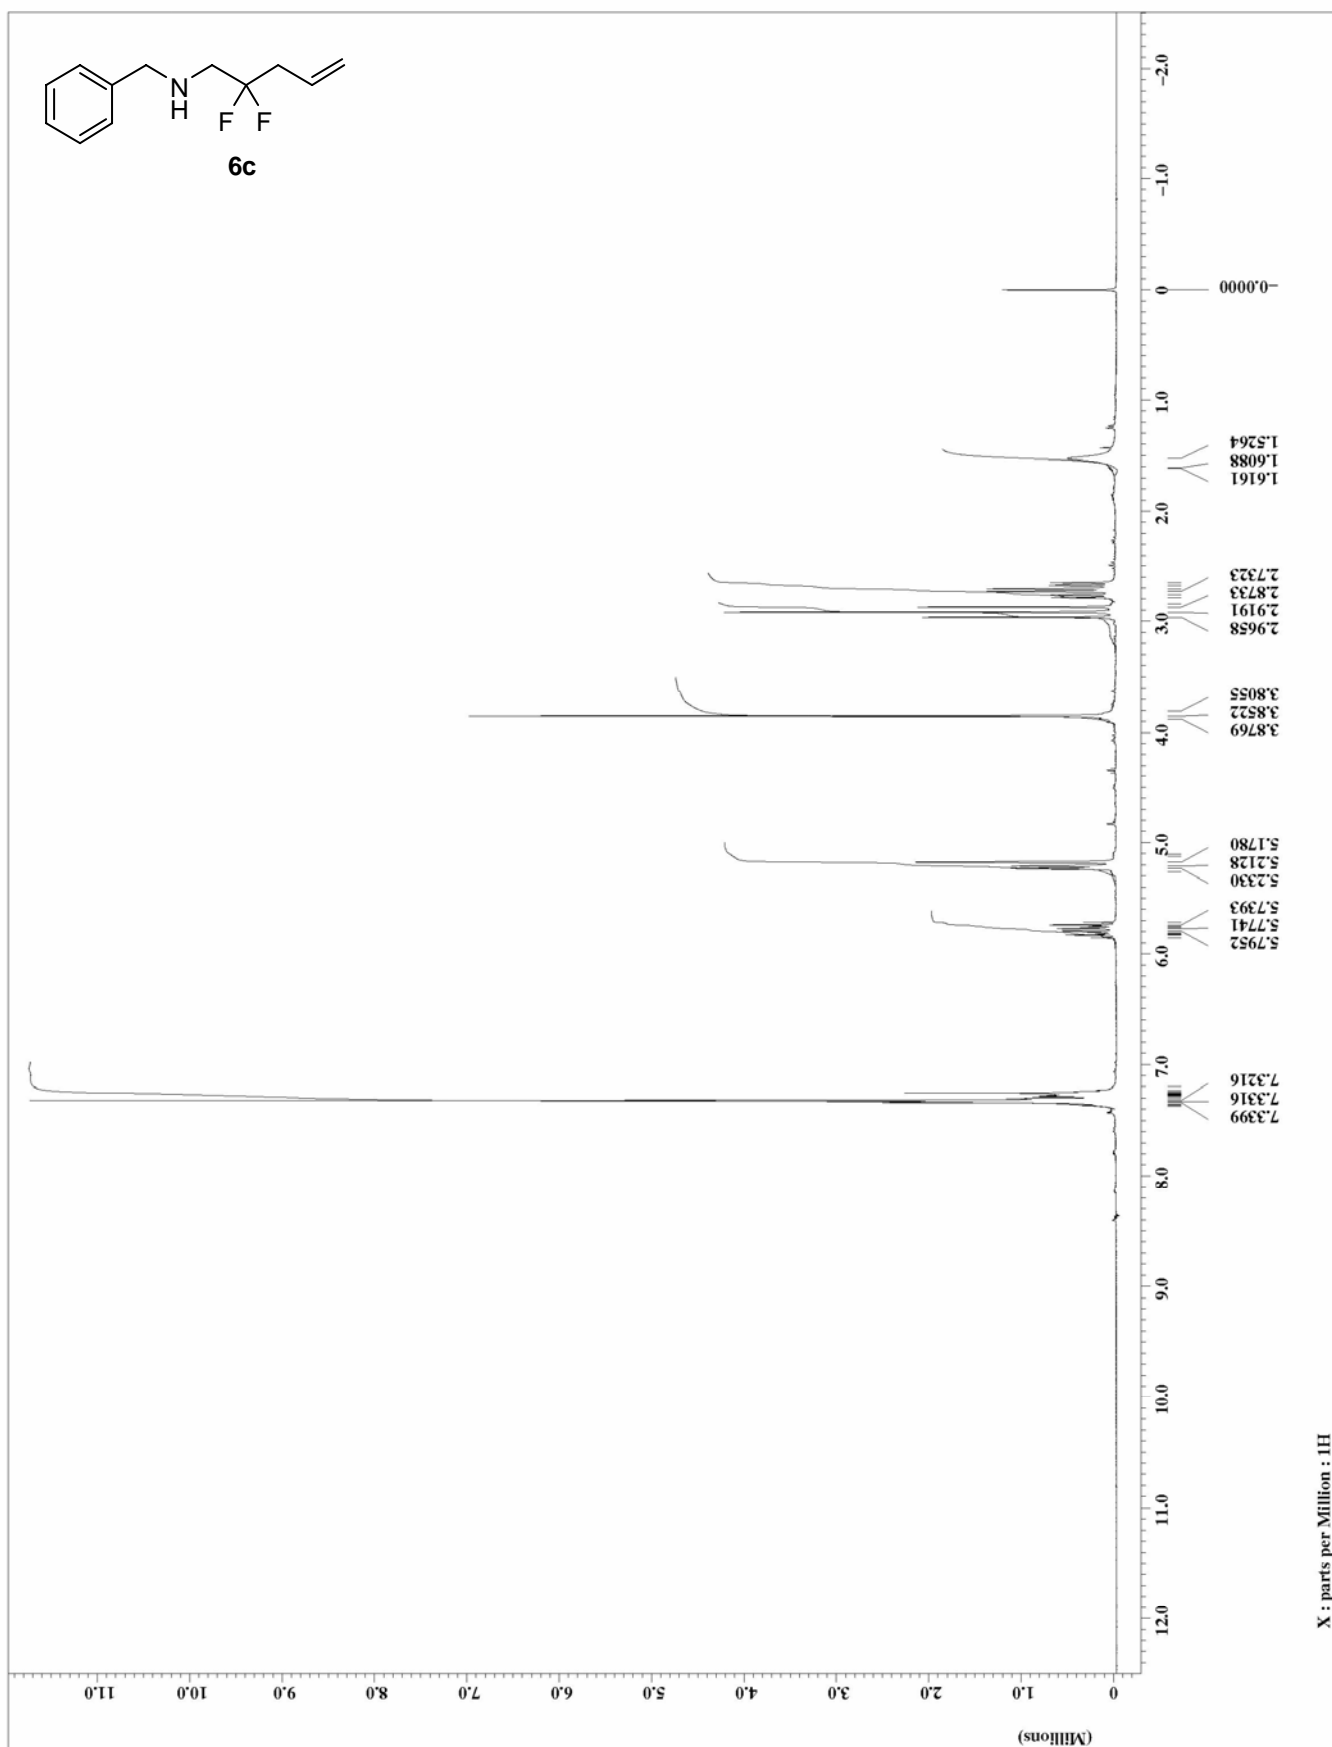

File : D:\GCMS-data\synthese\RS201.D  
Operator : AA  
Acquired : 7 Jun 2007 20:12 using AcqMethod Synthese.M  
Instrument : Instrument #1  
Sample Name :  
Misc Info :  
Vial Number: 97

201  
60

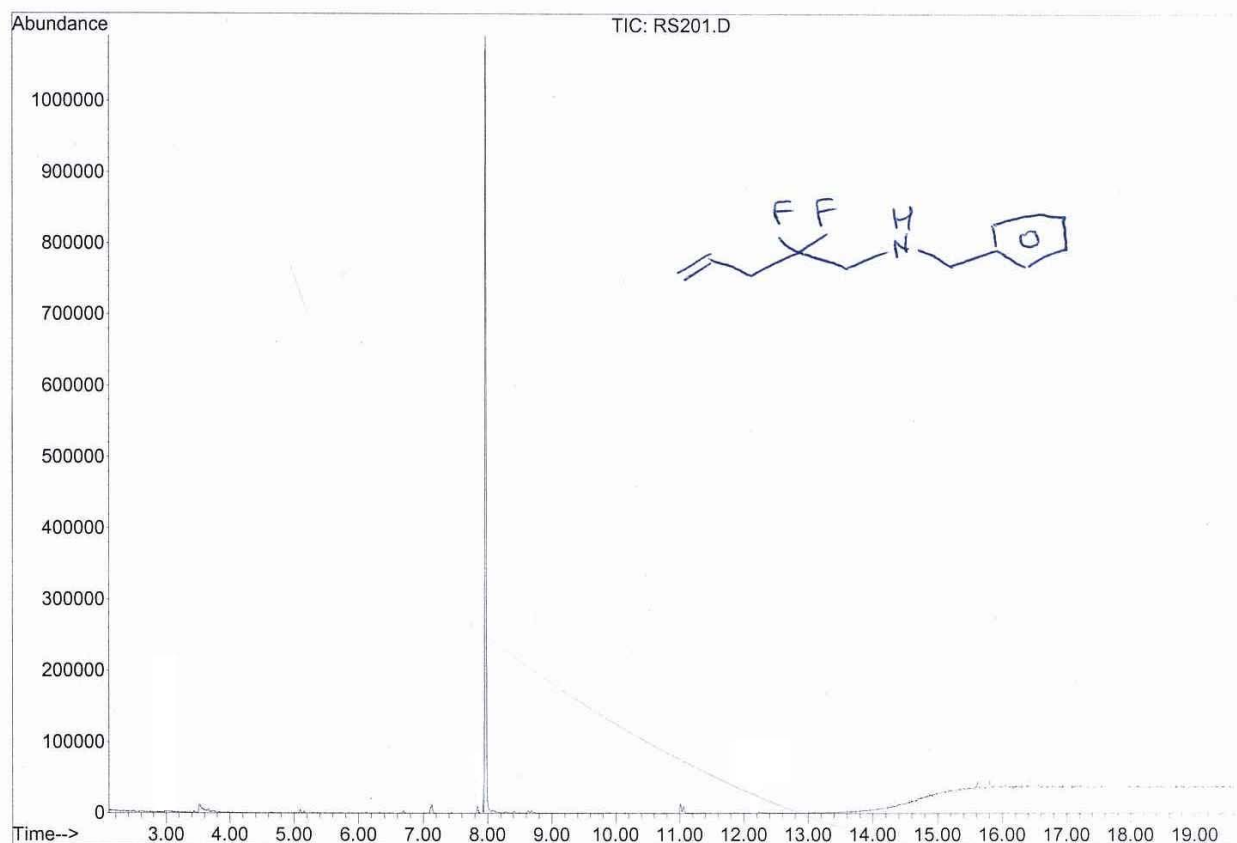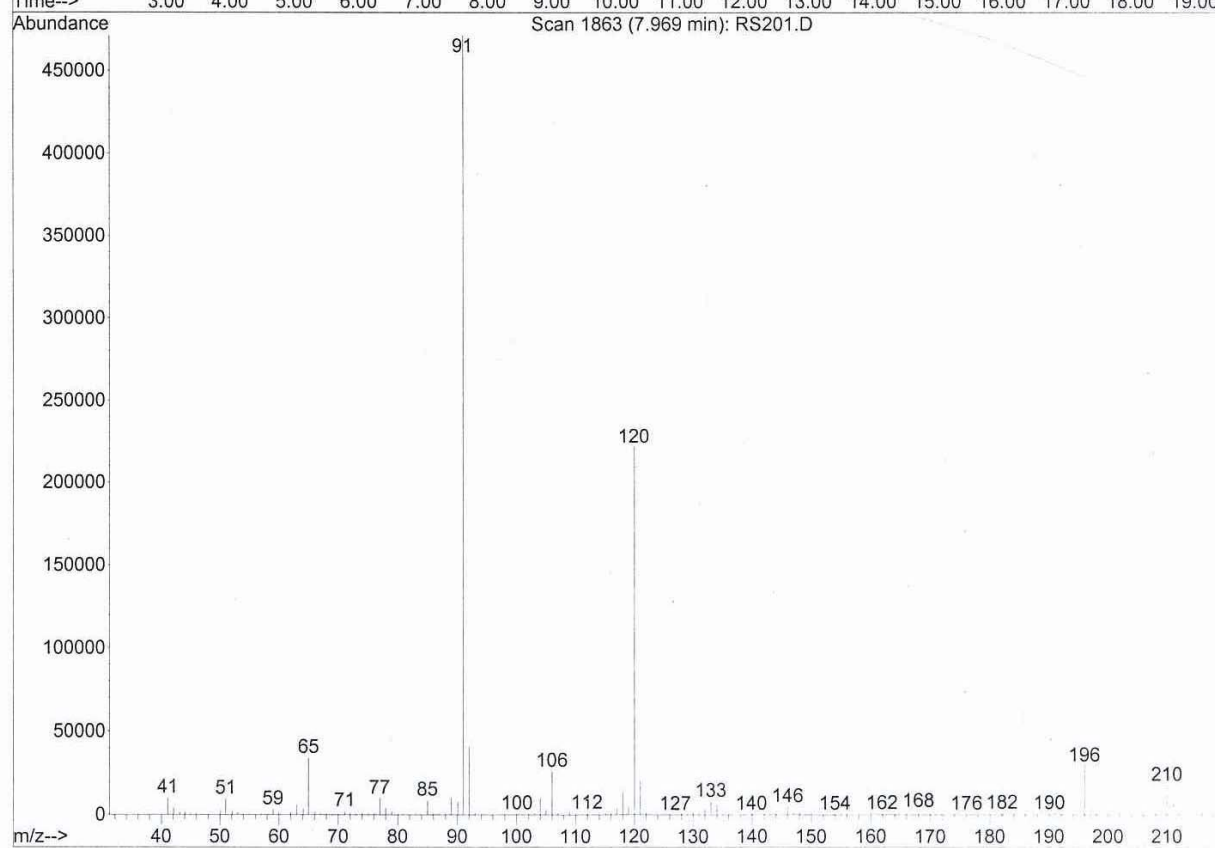

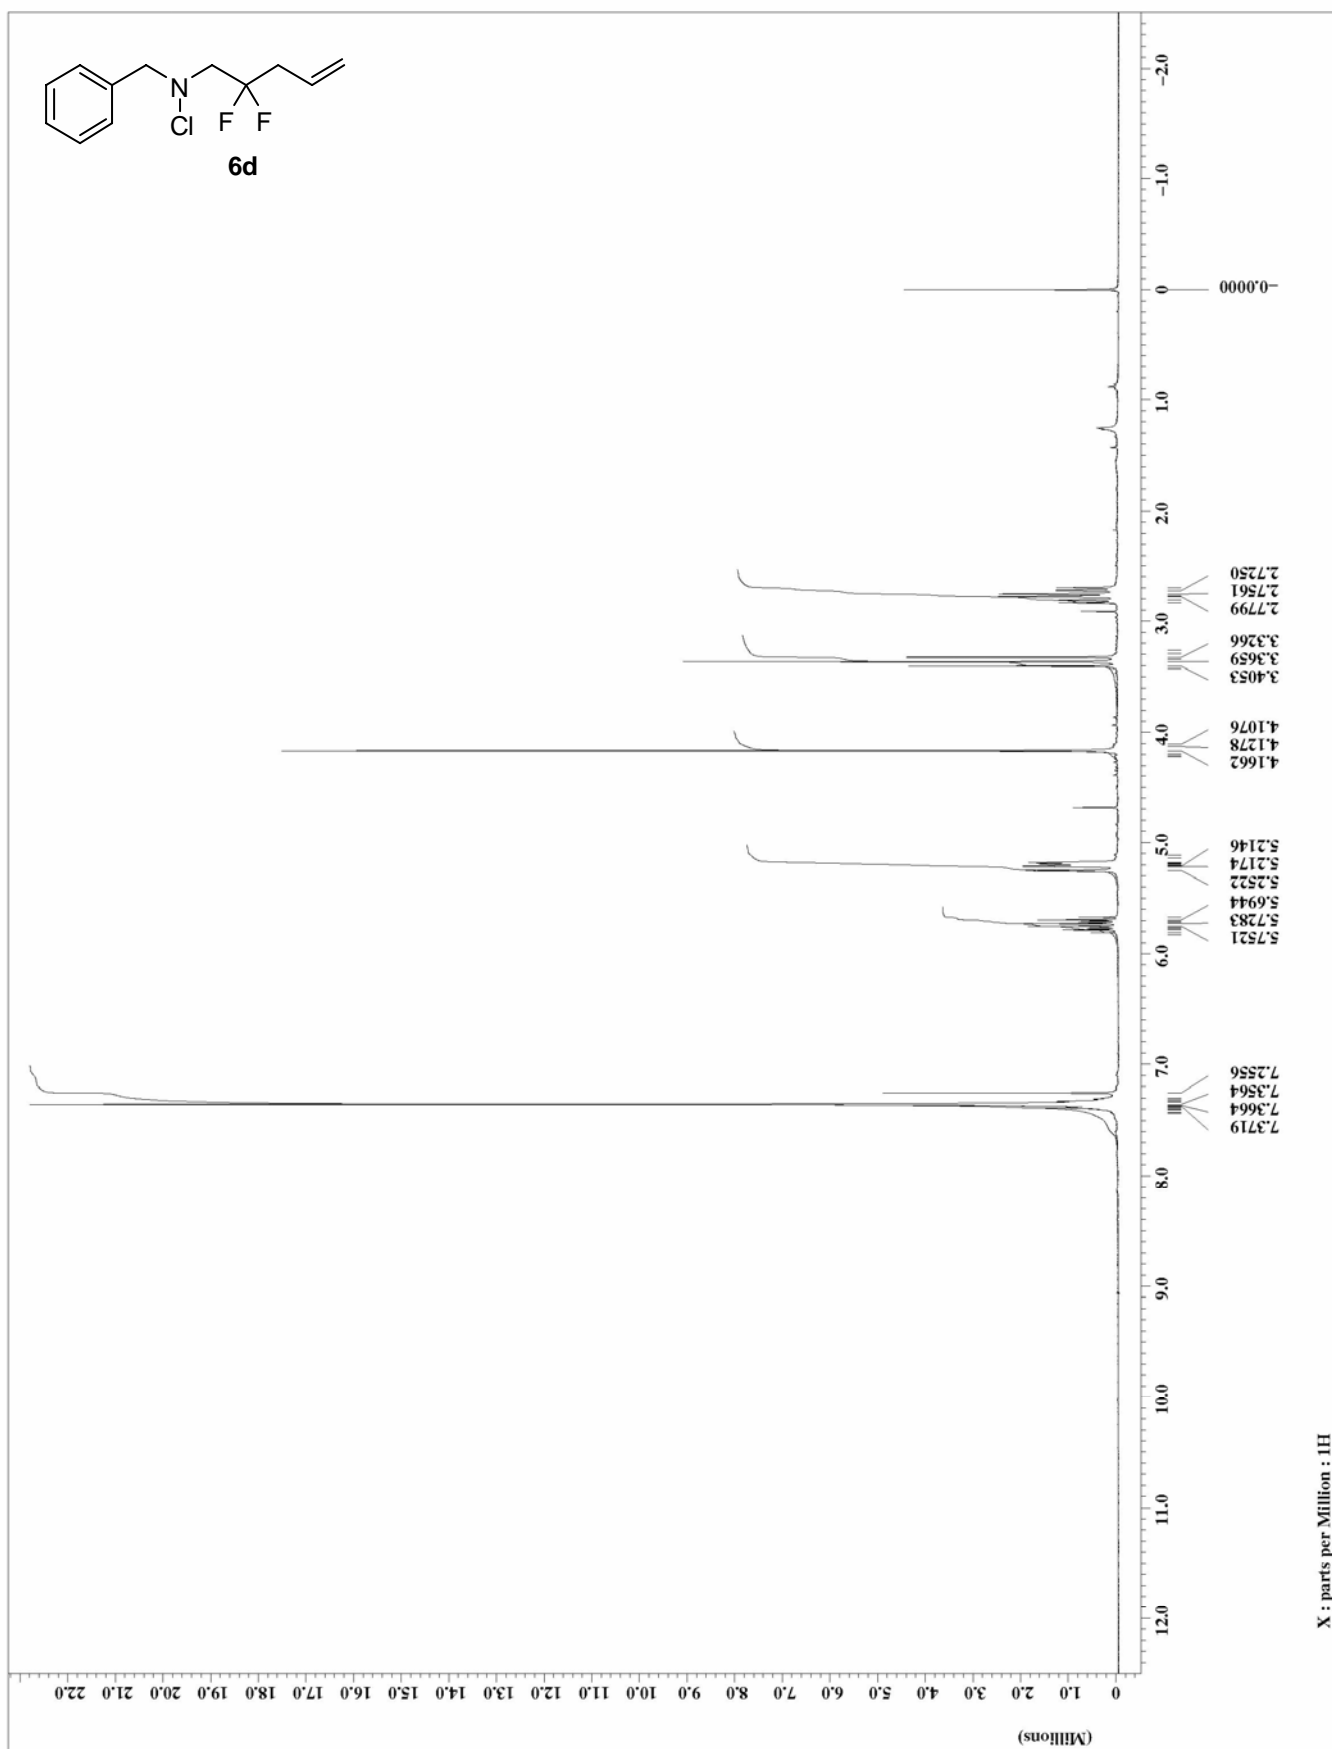

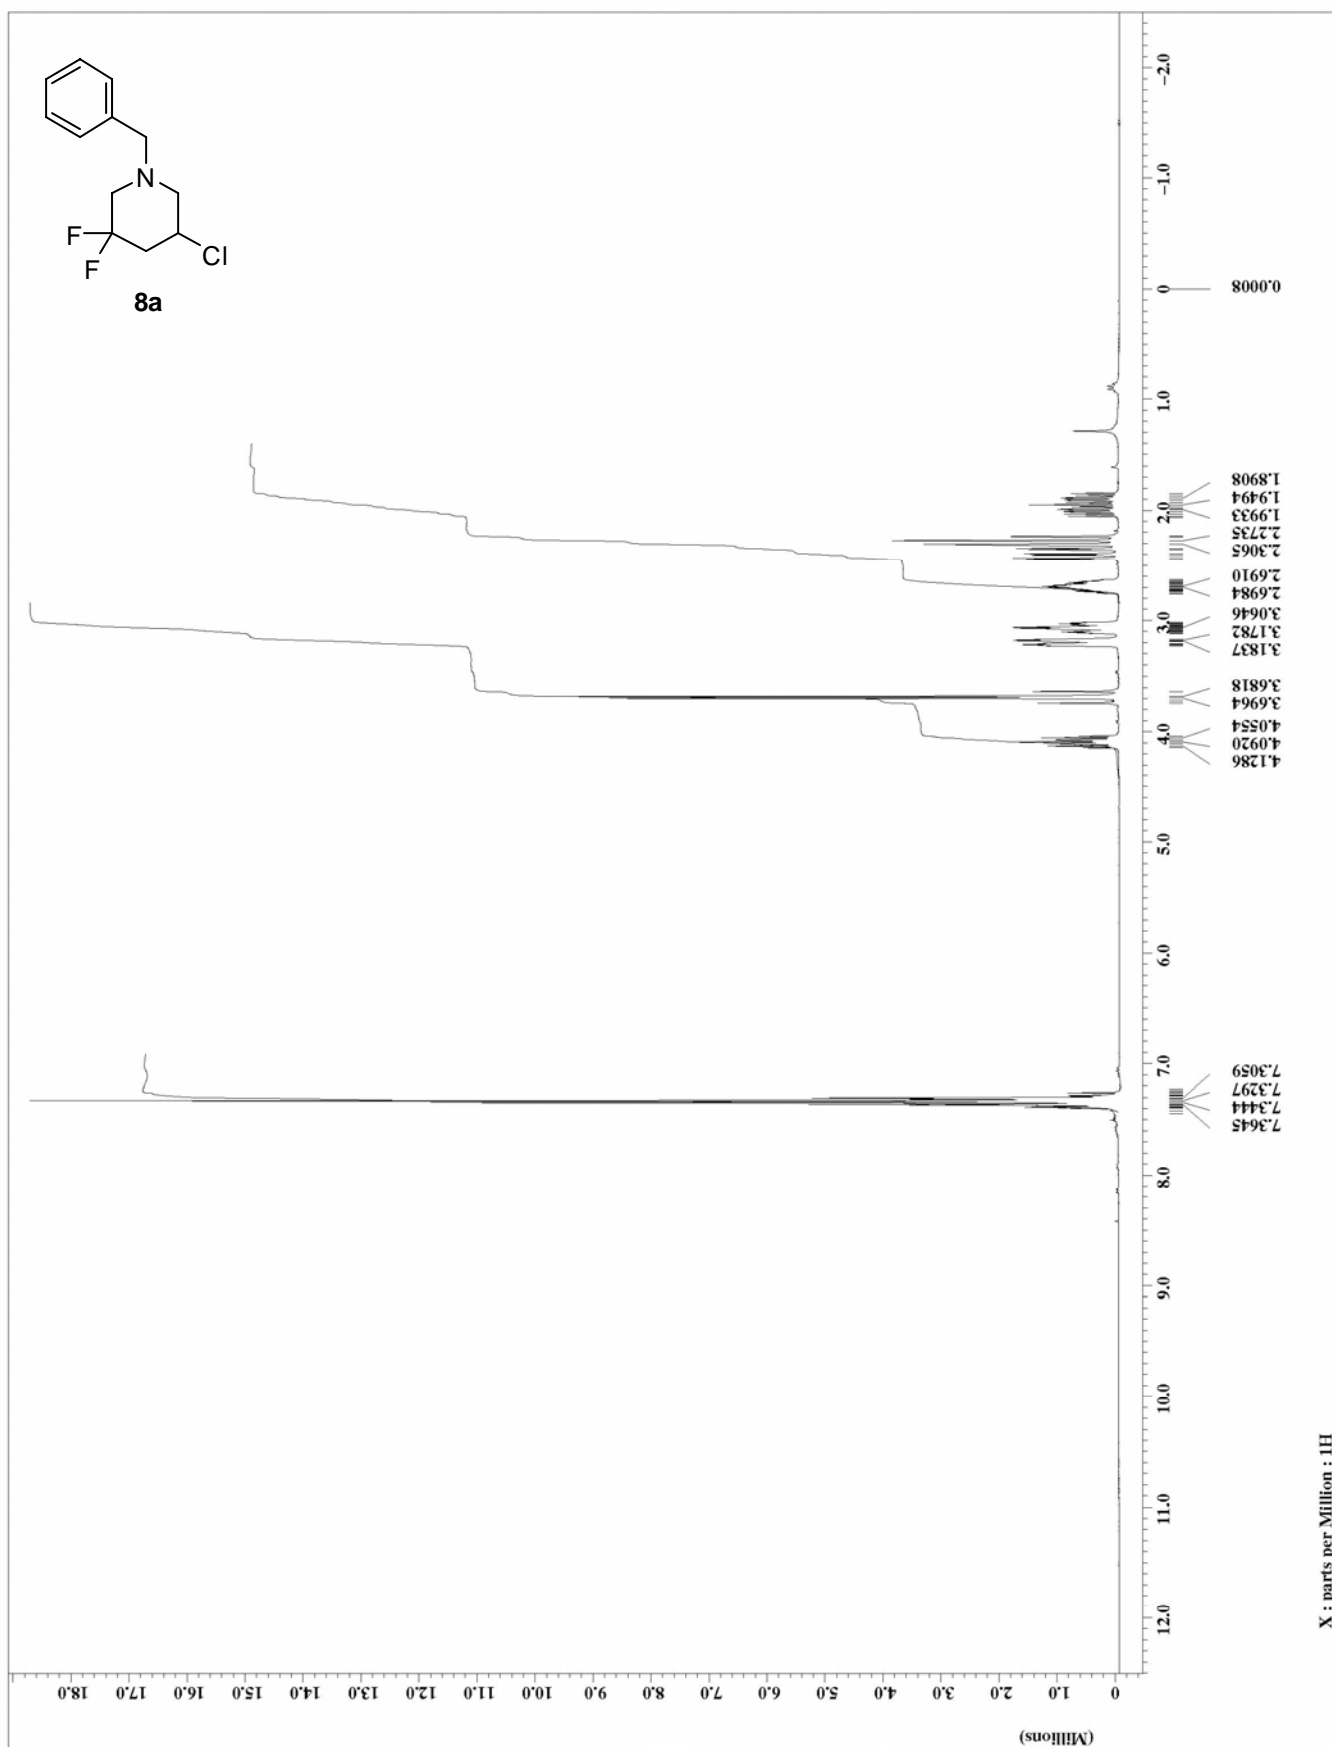





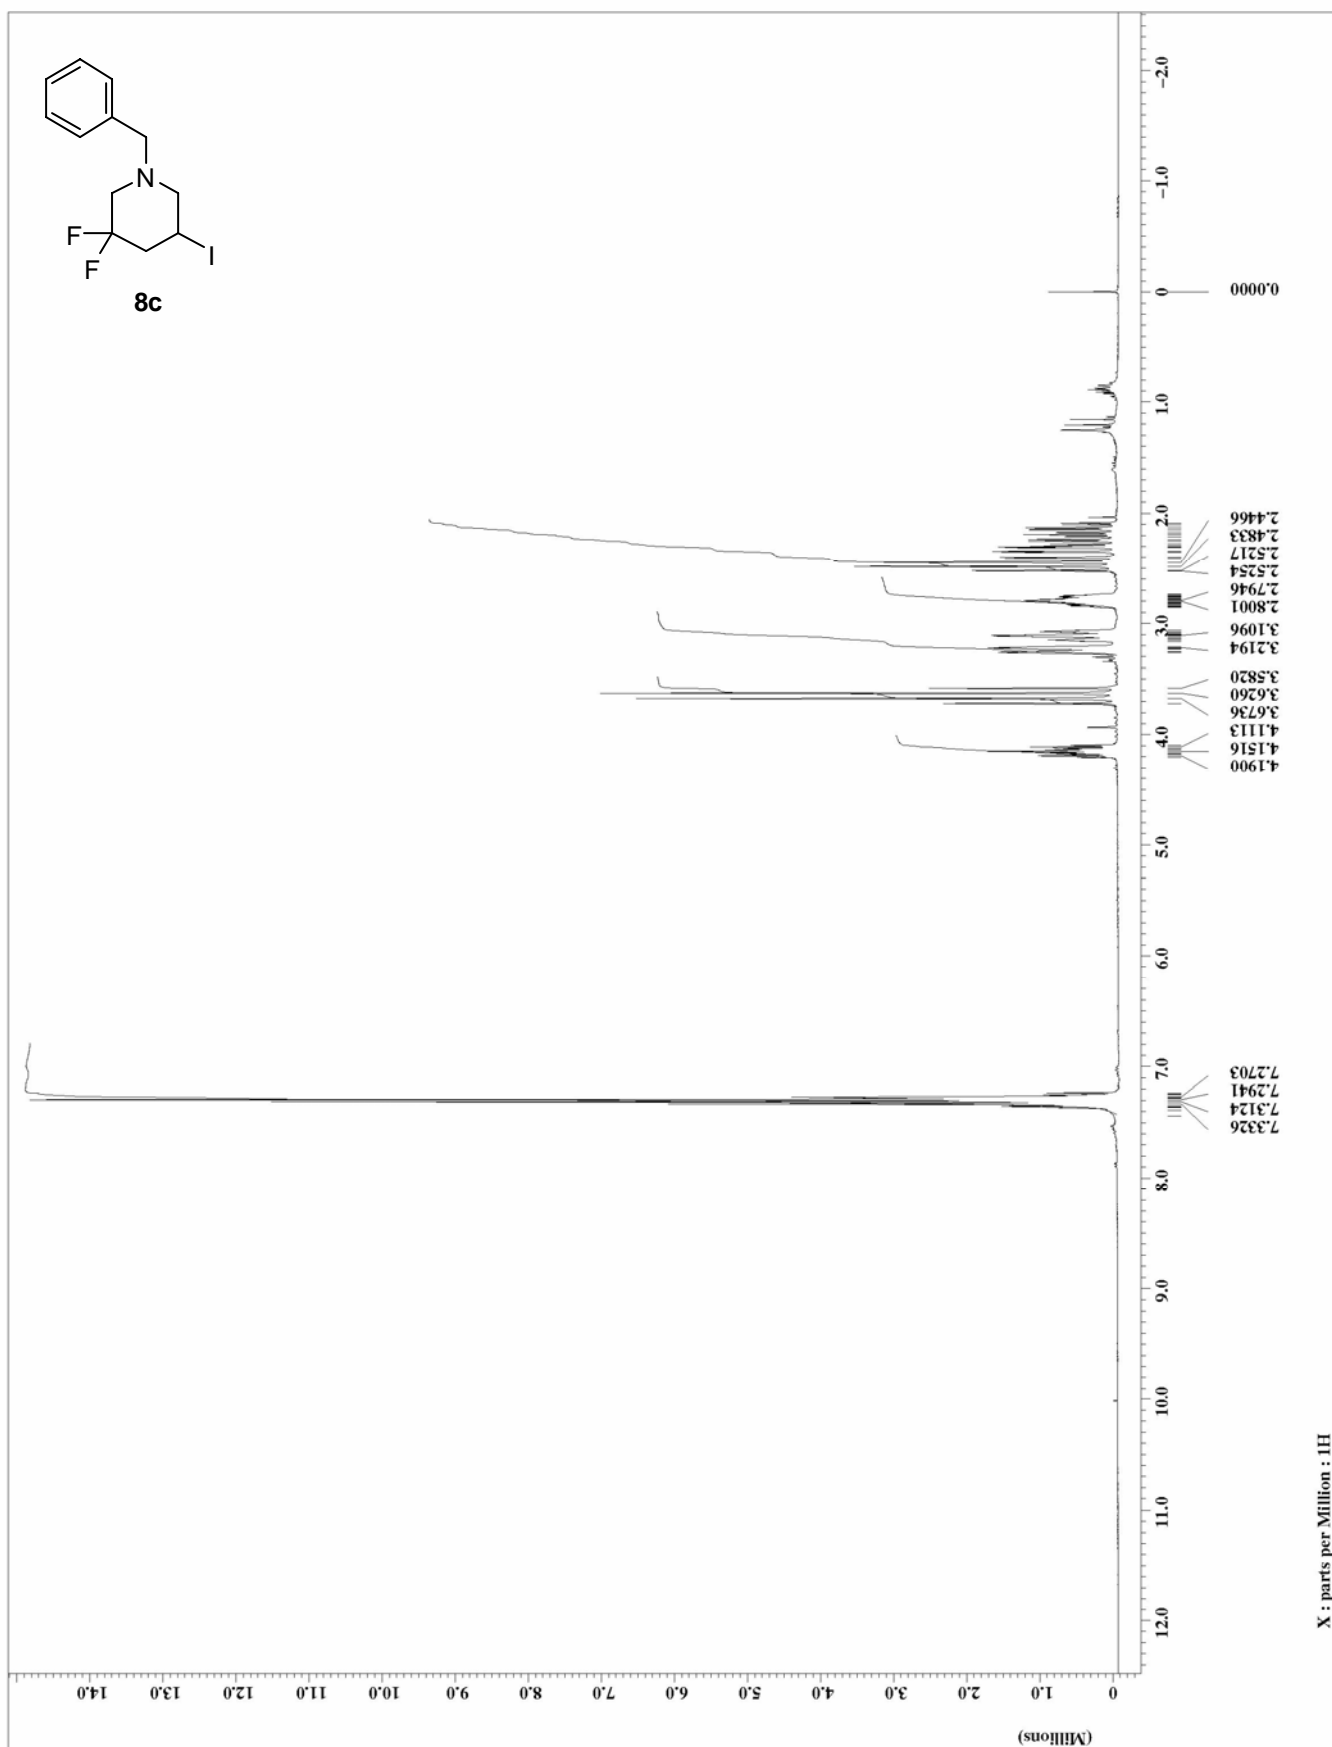



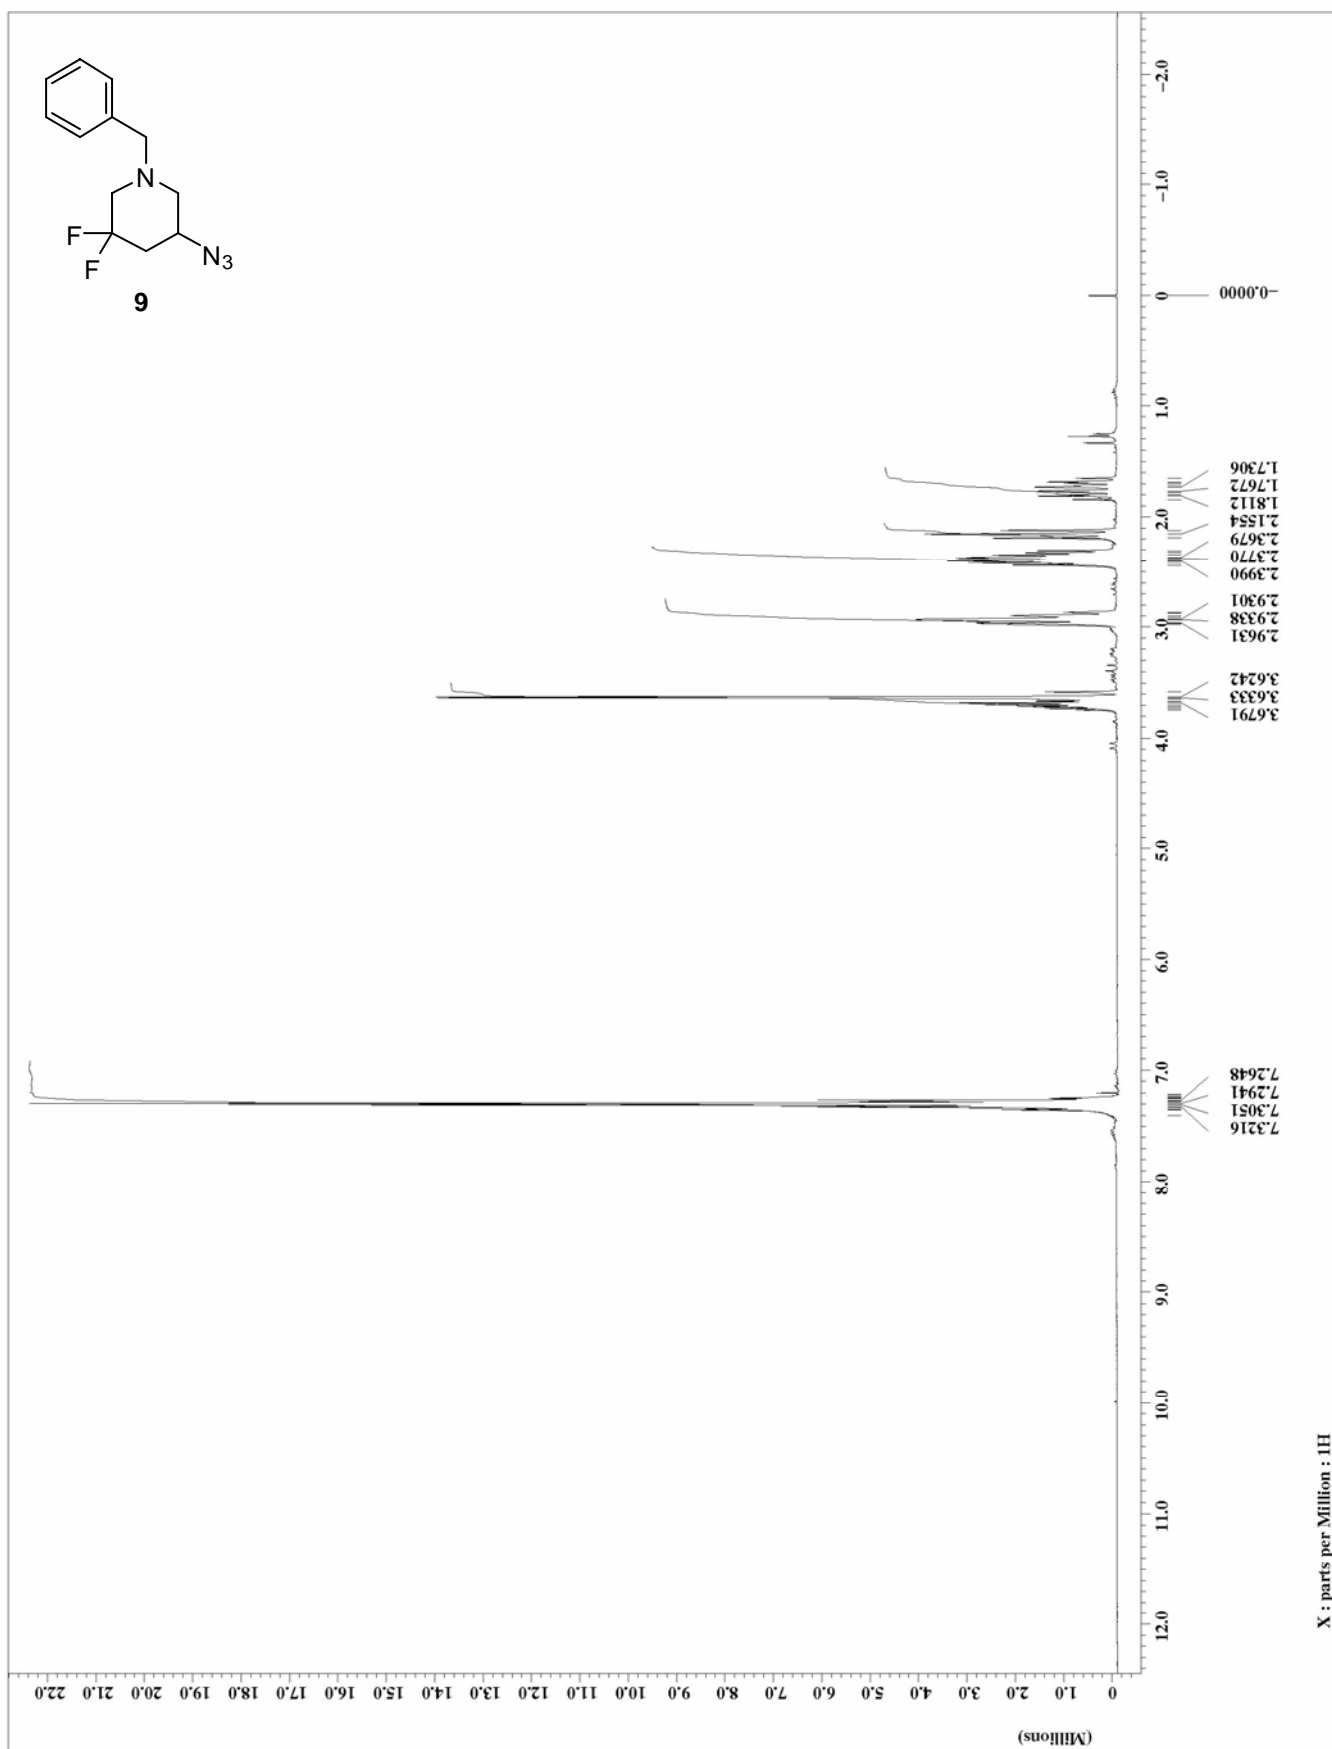

Current Chromatogram (s)

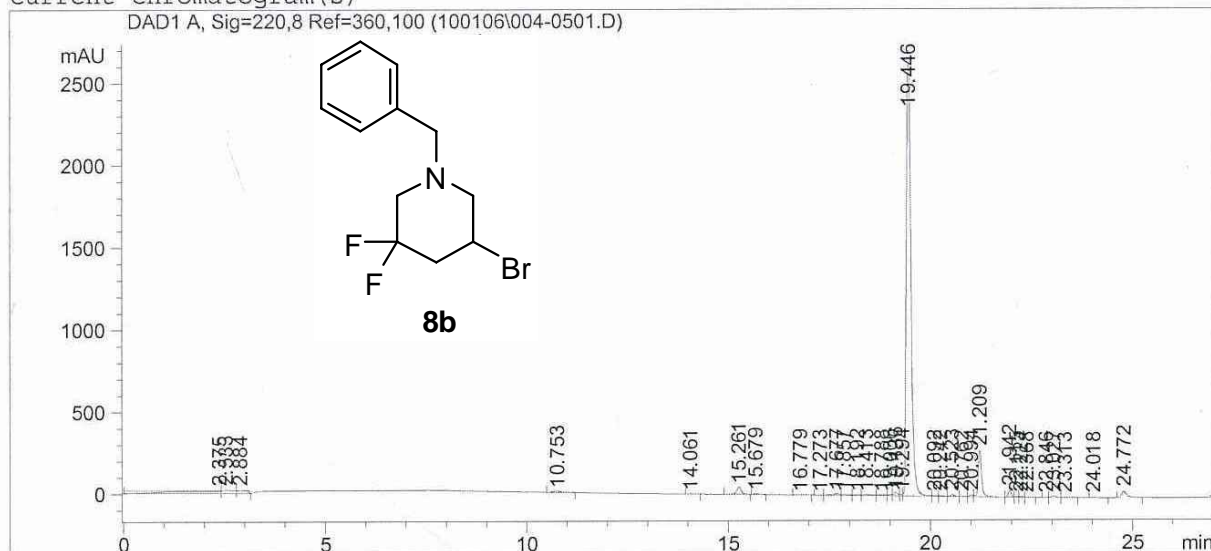

Current Chromatogram (s)

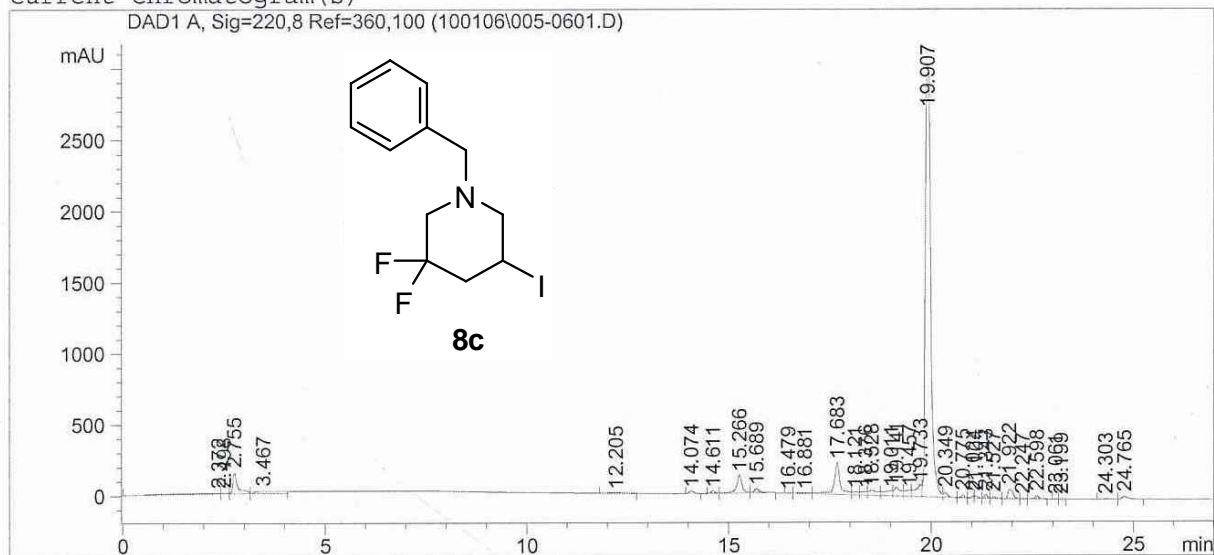

Current Chromatogram (s)

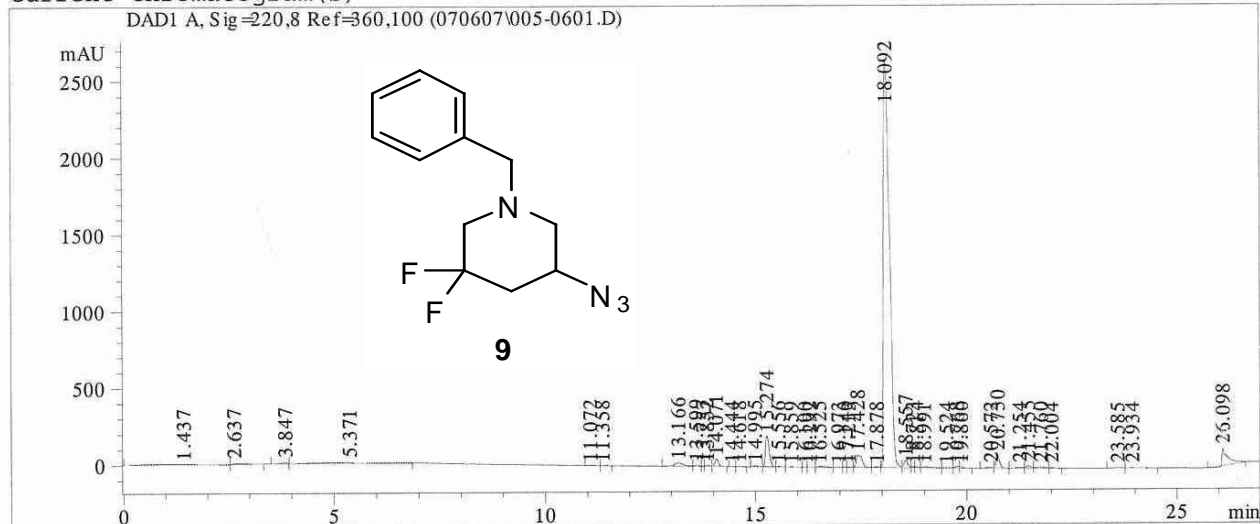

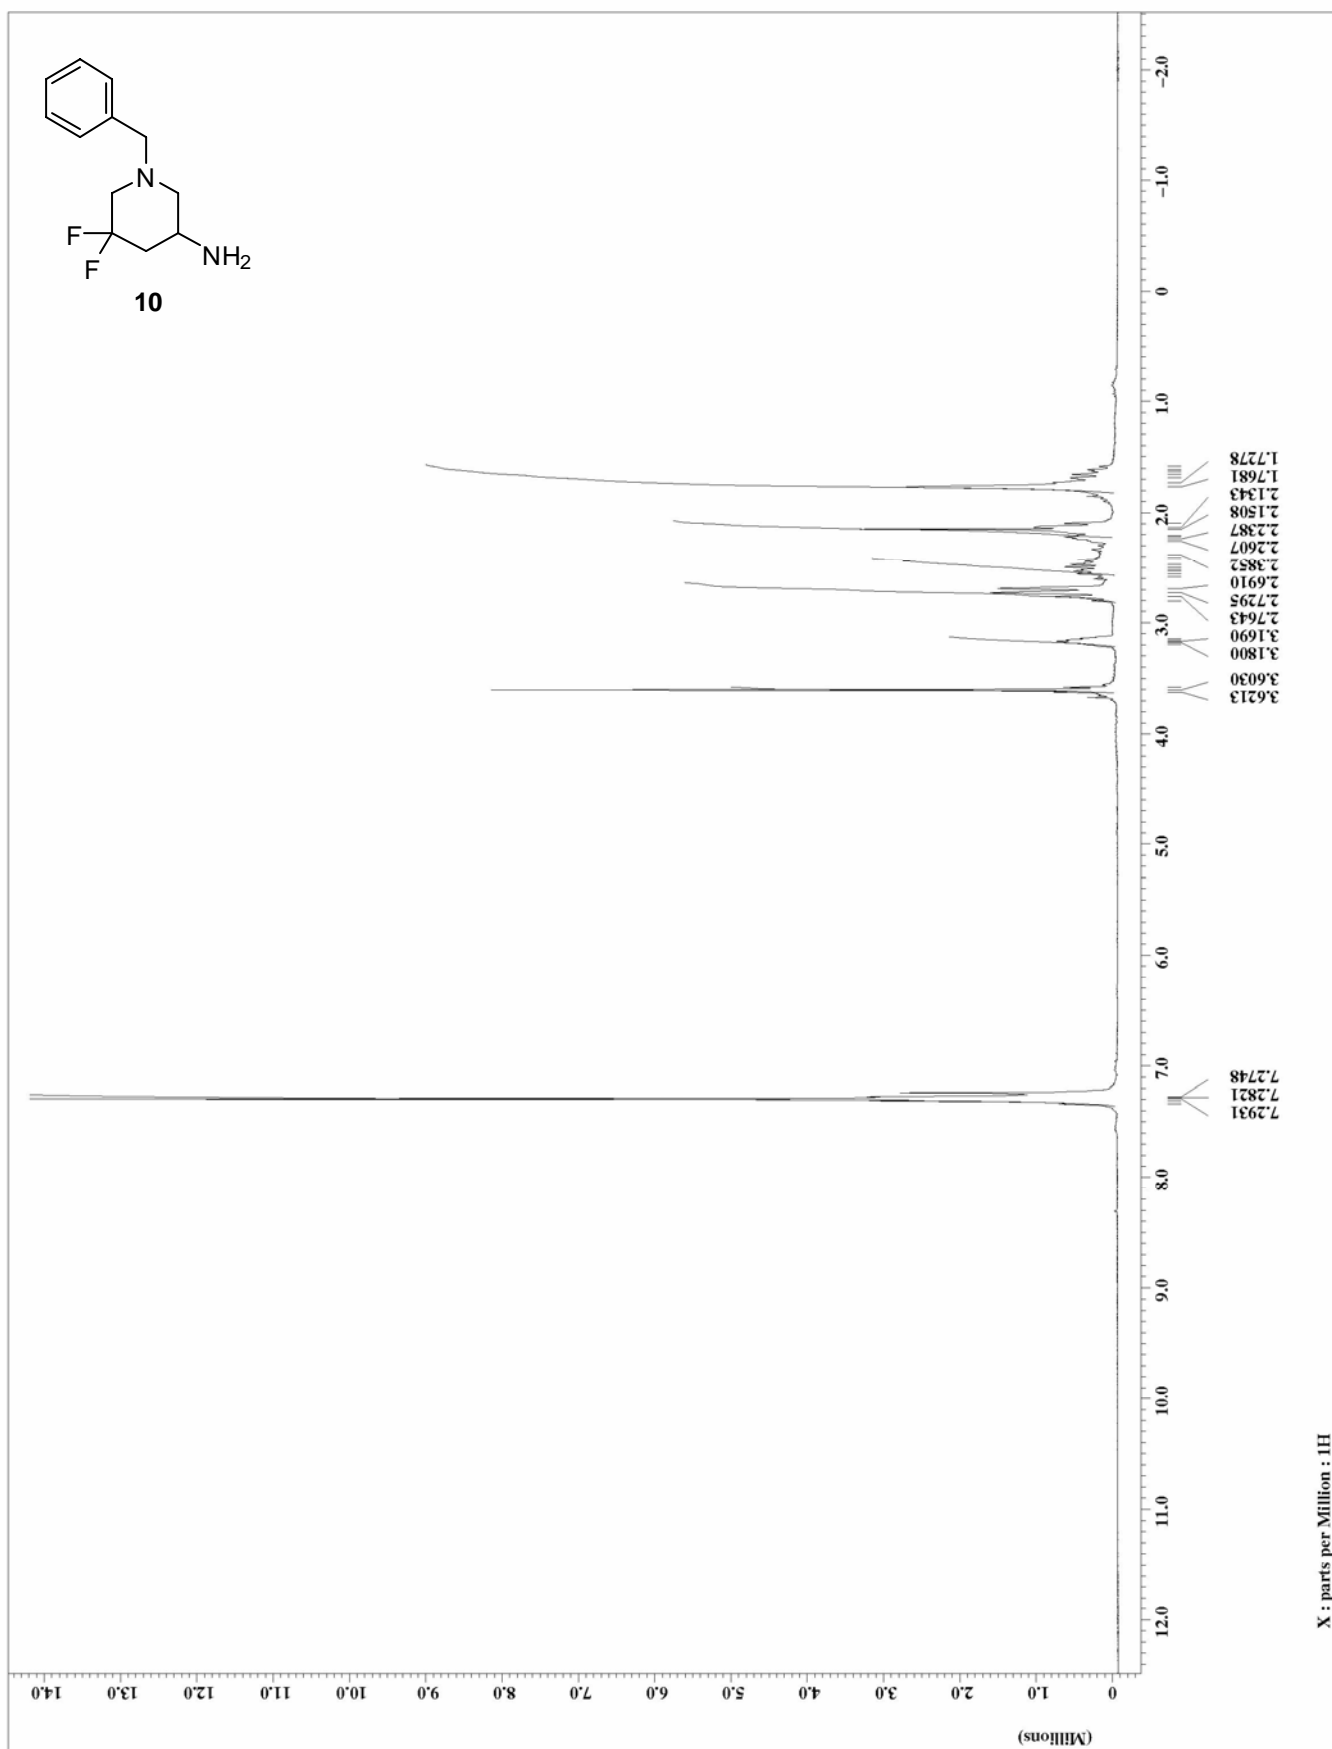

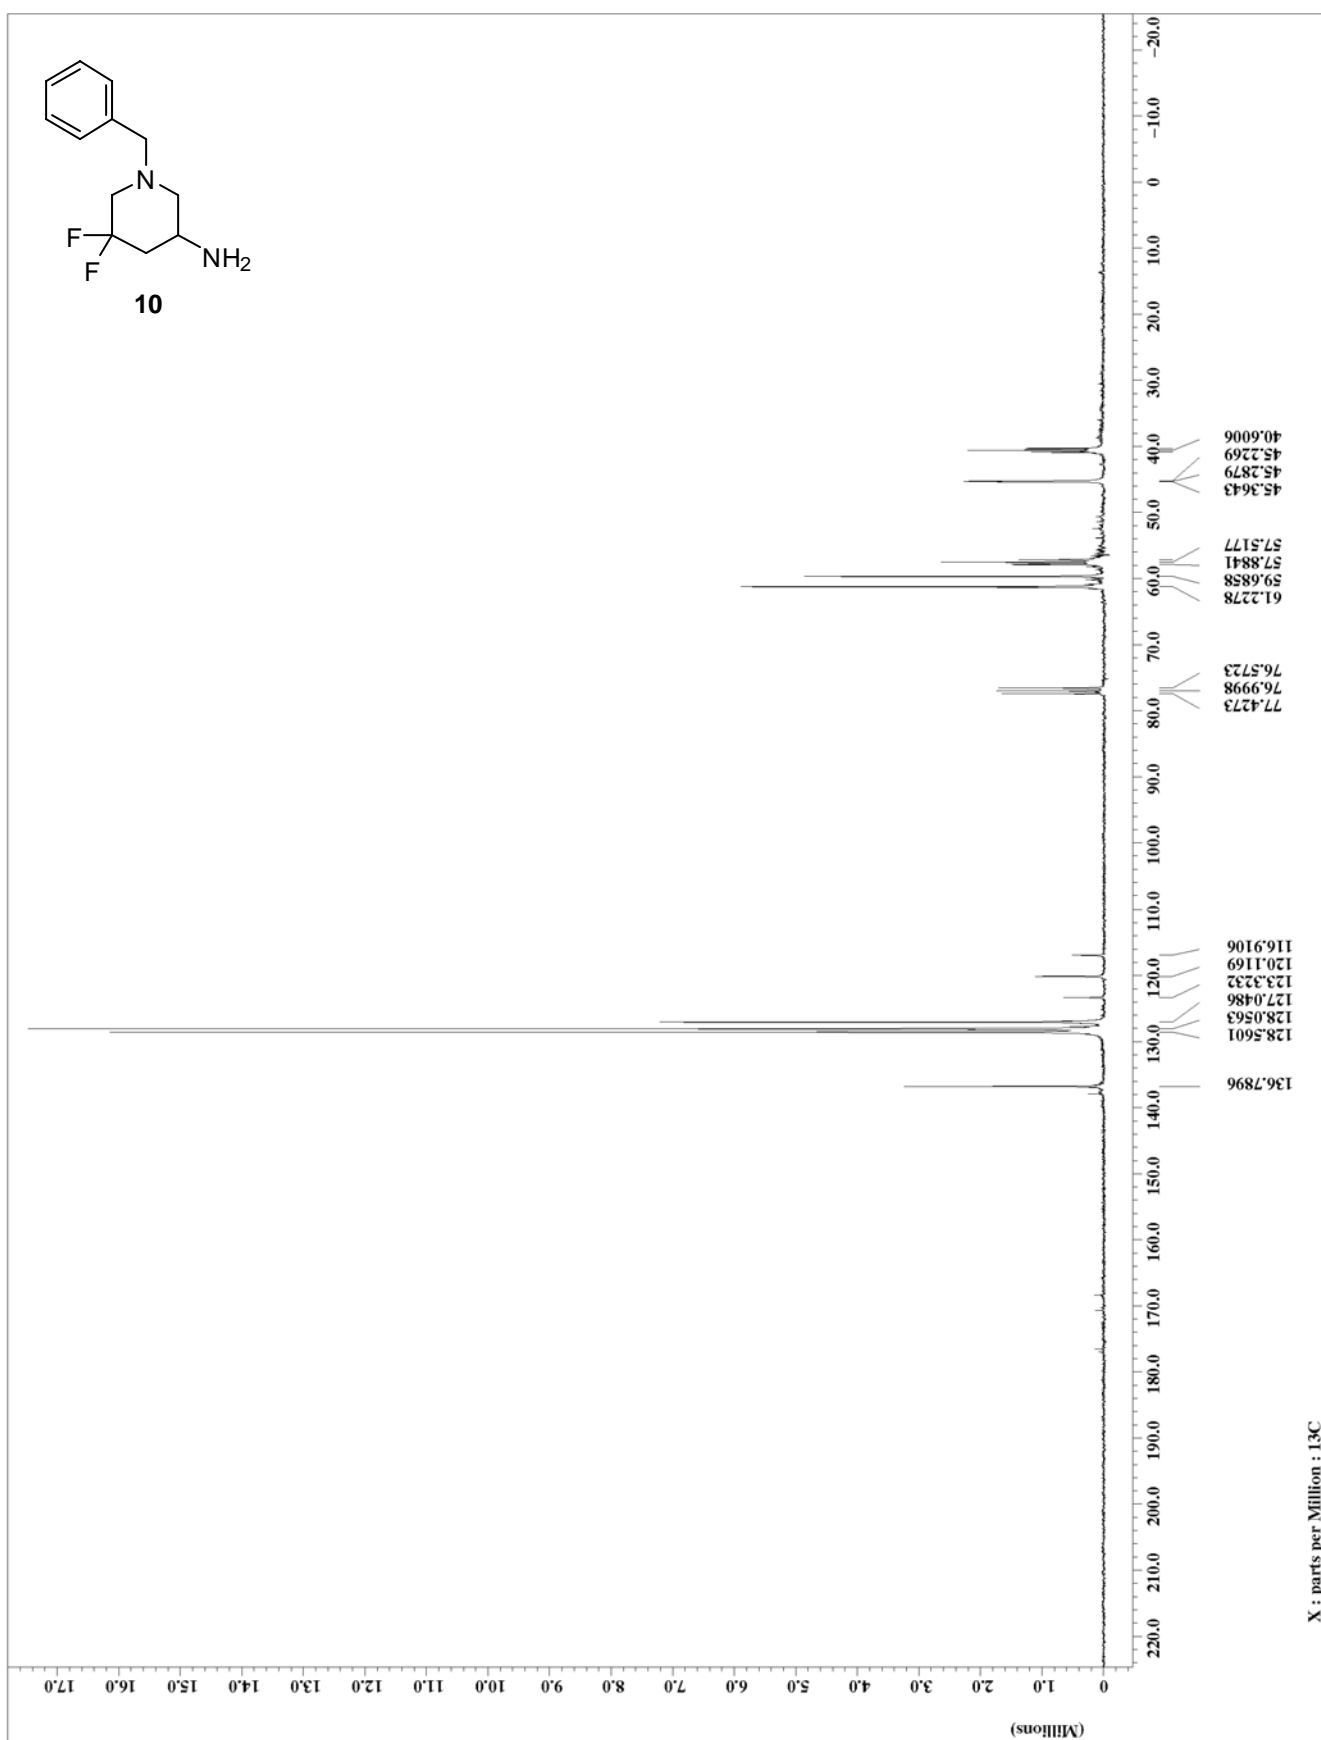

Print of window 38: Current Chromatogram(s)

Data File : C:\CHEM32\1\DATA\100427\SYNTHESE 2010-04-27 10-26-57\071-0201.D

Sample Name : RSNH2

=====

|                                        |                    |
|----------------------------------------|--------------------|
| Acq. Operator :                        | Seq. Line : 2      |
| Acq. Instrument : Instrument 1         | Location : Vial 71 |
| Injection Date : 4/27/2010 10:58:22 AM | Inj : 1            |
|                                        | Inj Volume : 20 µl |

Acq. Method : C:\Chem32\1\DATA\100427\SYNTHESE 2010-04-27 10-26-57\SYNTHESE-ALGEMEEN.M  
Last changed : 4/22/2010 4:57:52 PM  
Analysis Method : C:\CHEM32\1\DATA\100427\SYNTHESE 2010-04-27 10-26-57\071-0201.D\DA.M (SYNTHESE-ALGEMEEN.M)  
Last changed : 4/27/2010 11:28:35 AM  
Method Info : Methode algemeen synthese

Current Chromatogram(s)

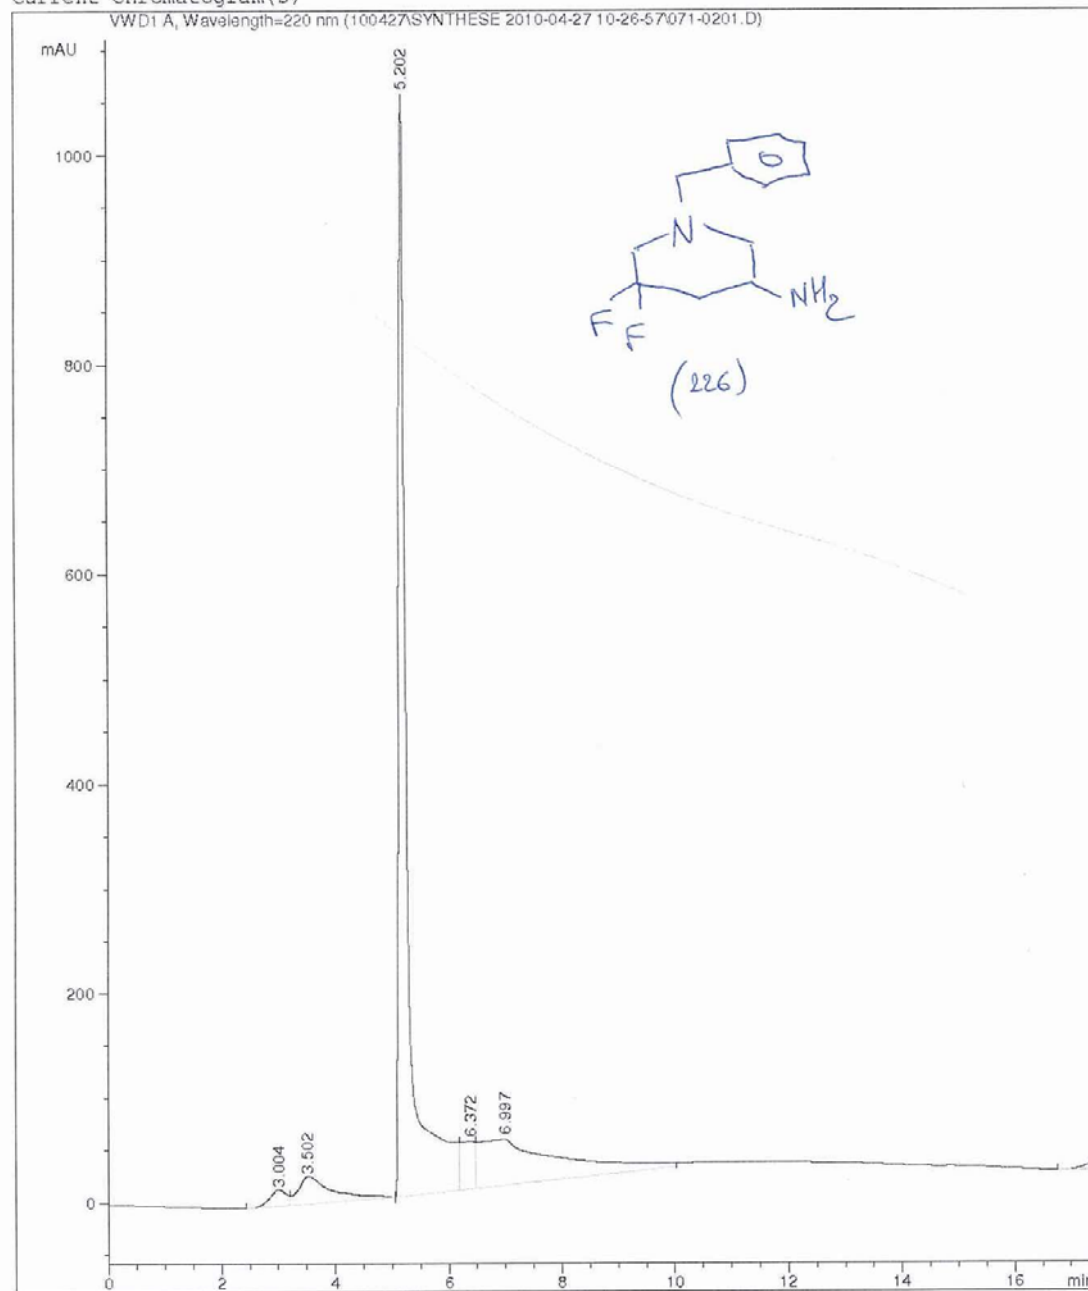

Instrument 1 4/27/2010 11:41:42 AM

Page 1 of 1

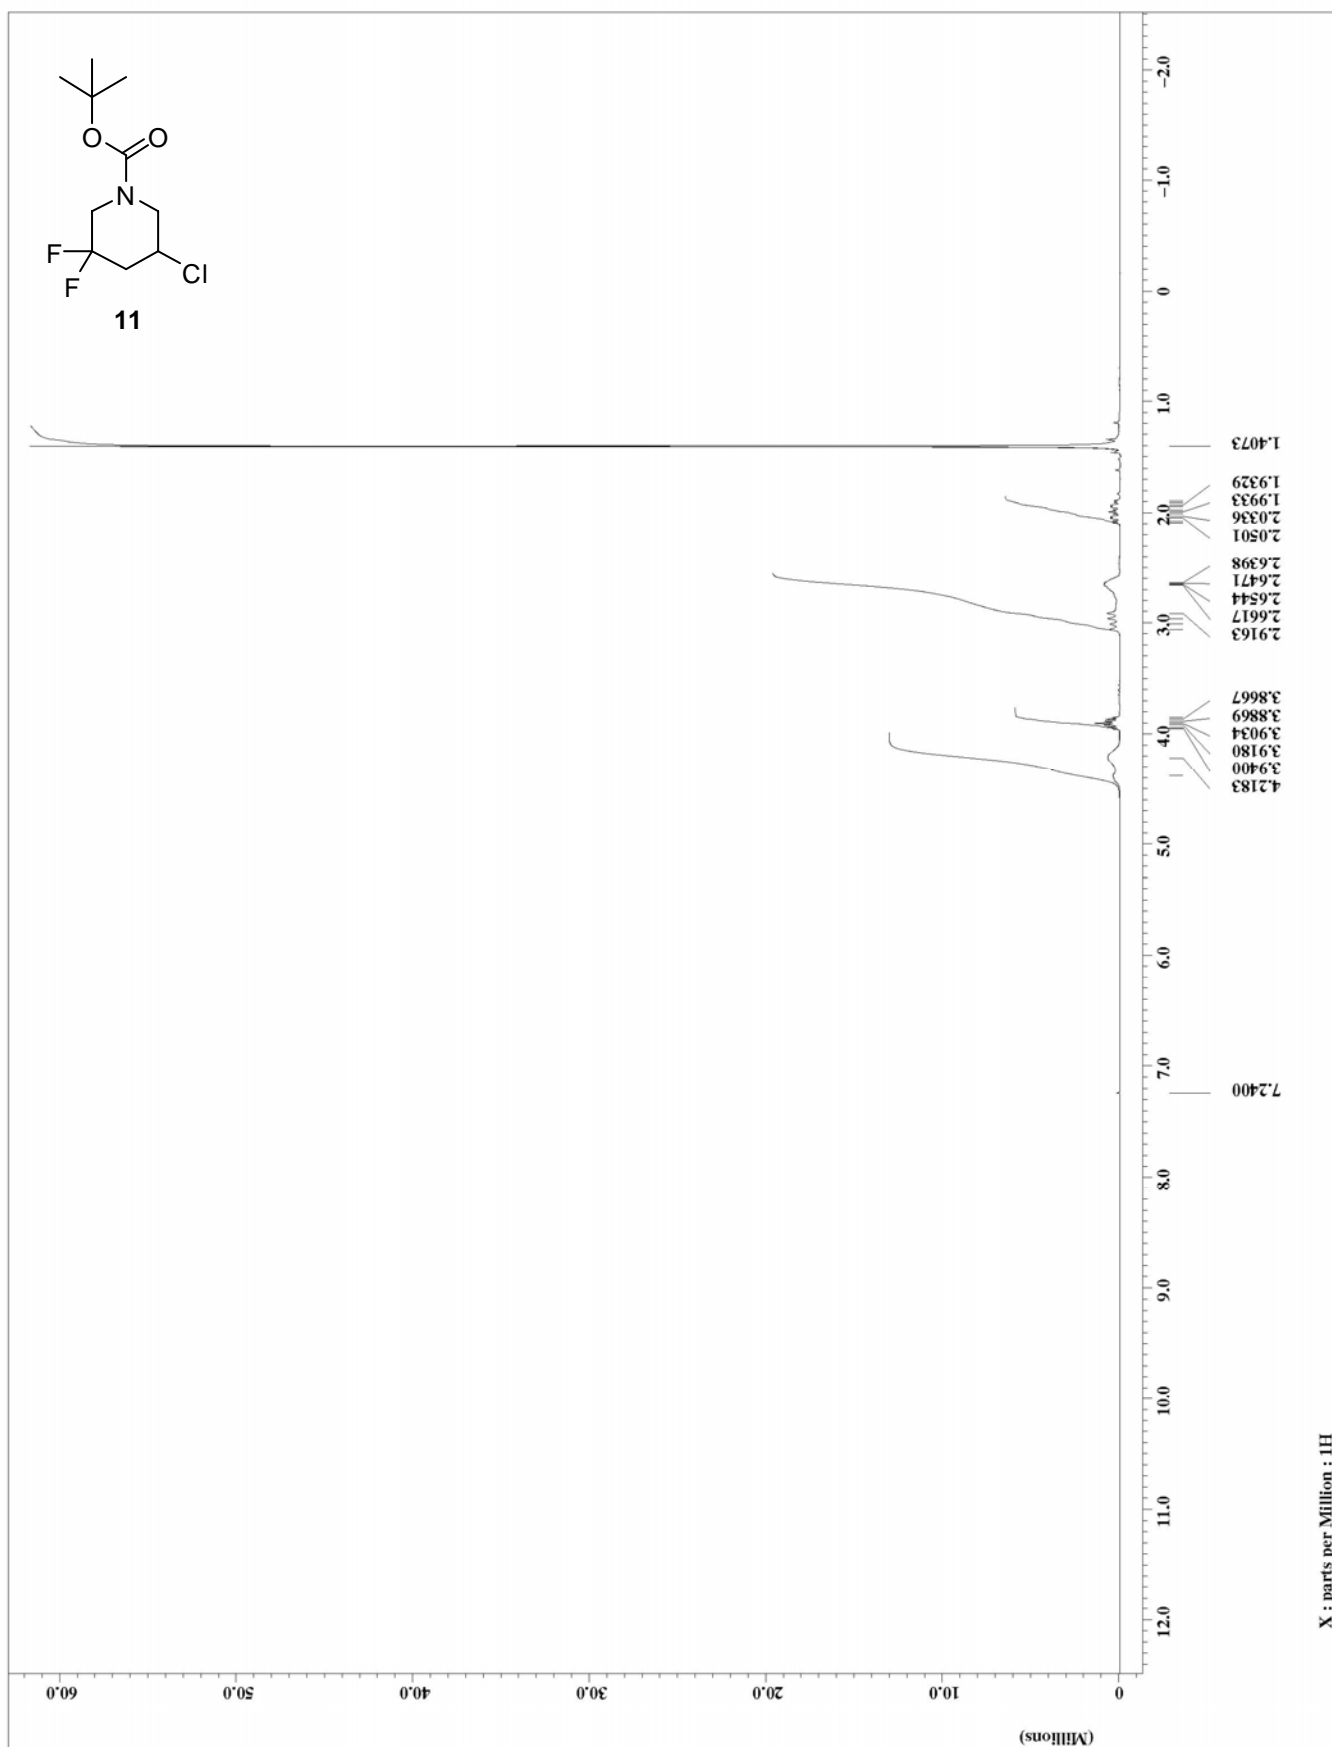

Data File C:\CHEM32\1\DATA\GCRUNS\SYNTHESE 2009-06-23 16-20-36\RS702 FLASH.D  
 Sample Name: RS702 flash

```

=====
Acq. Operator   : FC                               Seq. Line :    3
Acq. Instrument : GC 6890A                         Location  : Vial 1
Injection Date  : 23-Jun-09, 17:40:42             Inj       :    1
                                                    Inj Volume: 1 µl
Acq. Method     : C:\Chem32\1\DATA\GCRUNS\SYNTHESE 2009-06-23 16-20-36\SYNTS2.M
Last changed    : 4/21/2009 10:10:46 AM by FC
Analysis Method : C:\CHEM32\1\METHODS\CYD190M.M
Last changed    : 6/23/2009 9:08:19 AM by FC
                (modified after loading)
Method Info     : METHODE VOOR scheiding stalen op chirale kolom CYDEX B
    
```

(M)

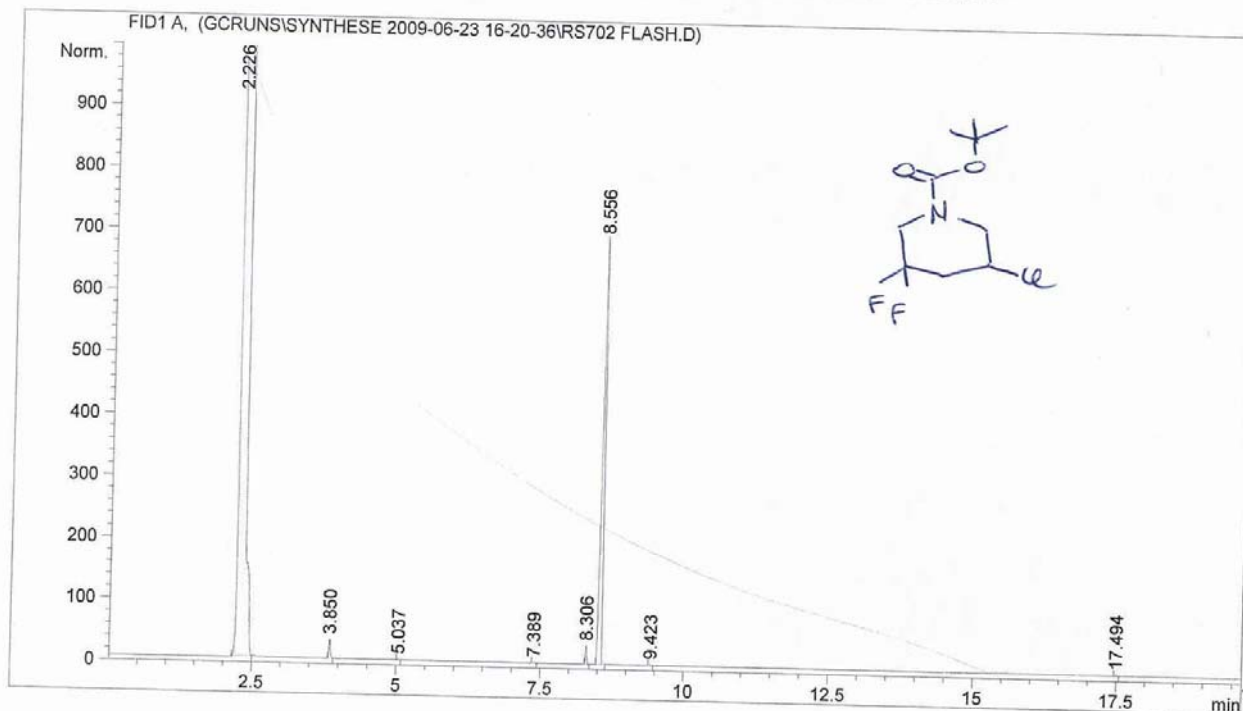

Area Percent Report

```

Sorted By           : Signal
Calib. Data Modified : 5/10/00 6:28:37 PM
Multiplier          : 1.0000
Dilution            : 1.0000
Use Multiplier & Dilution Factor with ISTDs
    
```

Signal 1: FID1 A,

| Peak # | RetTime [min] | Type | Width [min] | Area [pA*s] | Area %   | Name |
|--------|---------------|------|-------------|-------------|----------|------|
| 1      | 2.226         | BB S | 0.0650      | 1.33652e5   | 98.55521 | ?    |
| 2      | 3.850         | BB   | 0.0273      | 56.12193    | 0.04138  | ?    |
| 3      | 5.037         | BB   | 0.0251      | 2.25967     | 0.00167  | ?    |
| 4      | 7.389         | BB   | 0.0262      | 2.07265     | 0.00153  | ?    |
| 5      | 8.306         | BB   | 0.0273      | 51.54955    | 0.03801  | ?    |
| 6      | 8.556         | BB   | 0.0362      | 1841.76550  | 1.35812  | ?    |
| 7      | 9.423         | BB   | 0.0273      | 2.55805     | 0.00189  | ?    |
| 8      | 17.494        | BB   | 0.0280      | 2.96302     | 0.00218  | ?    |

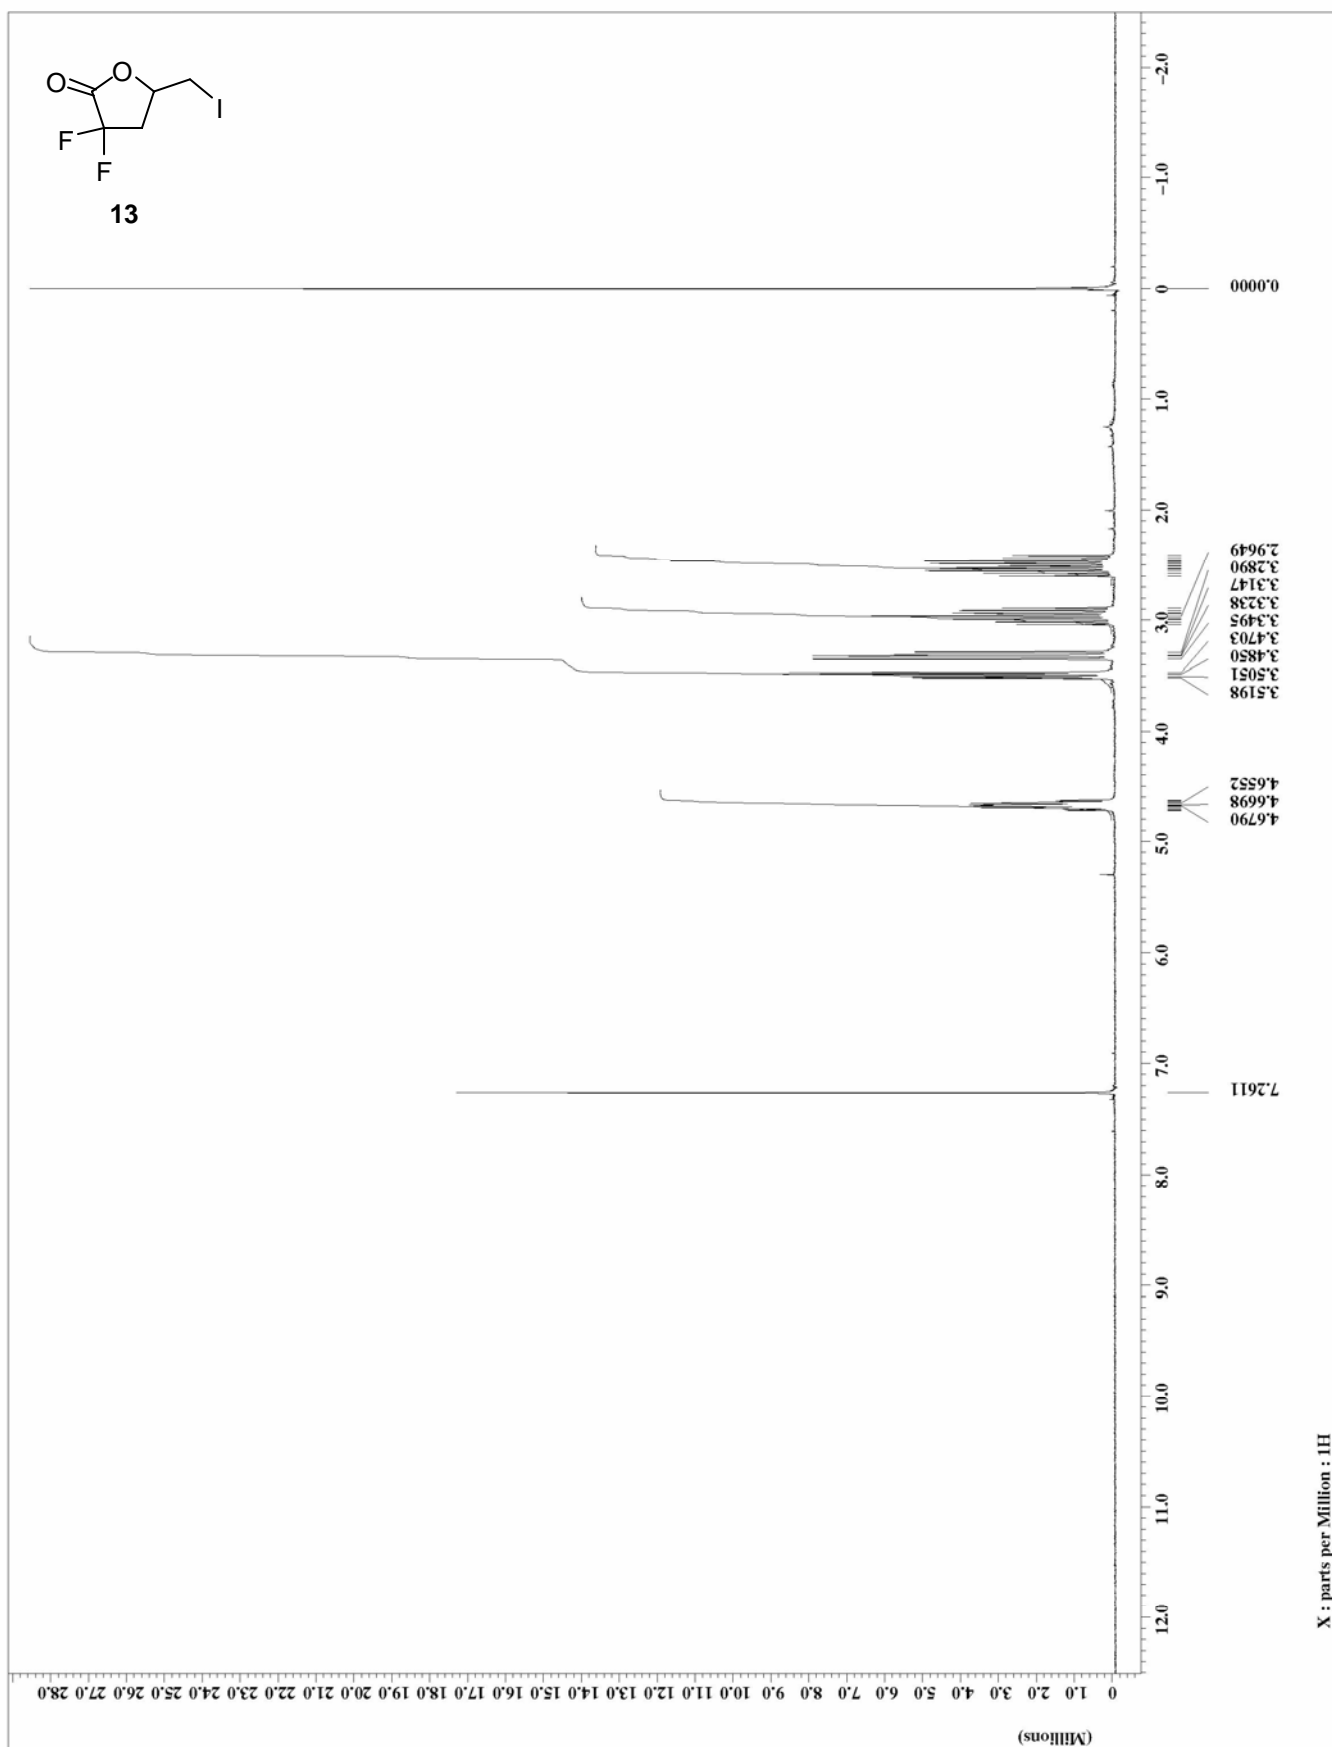





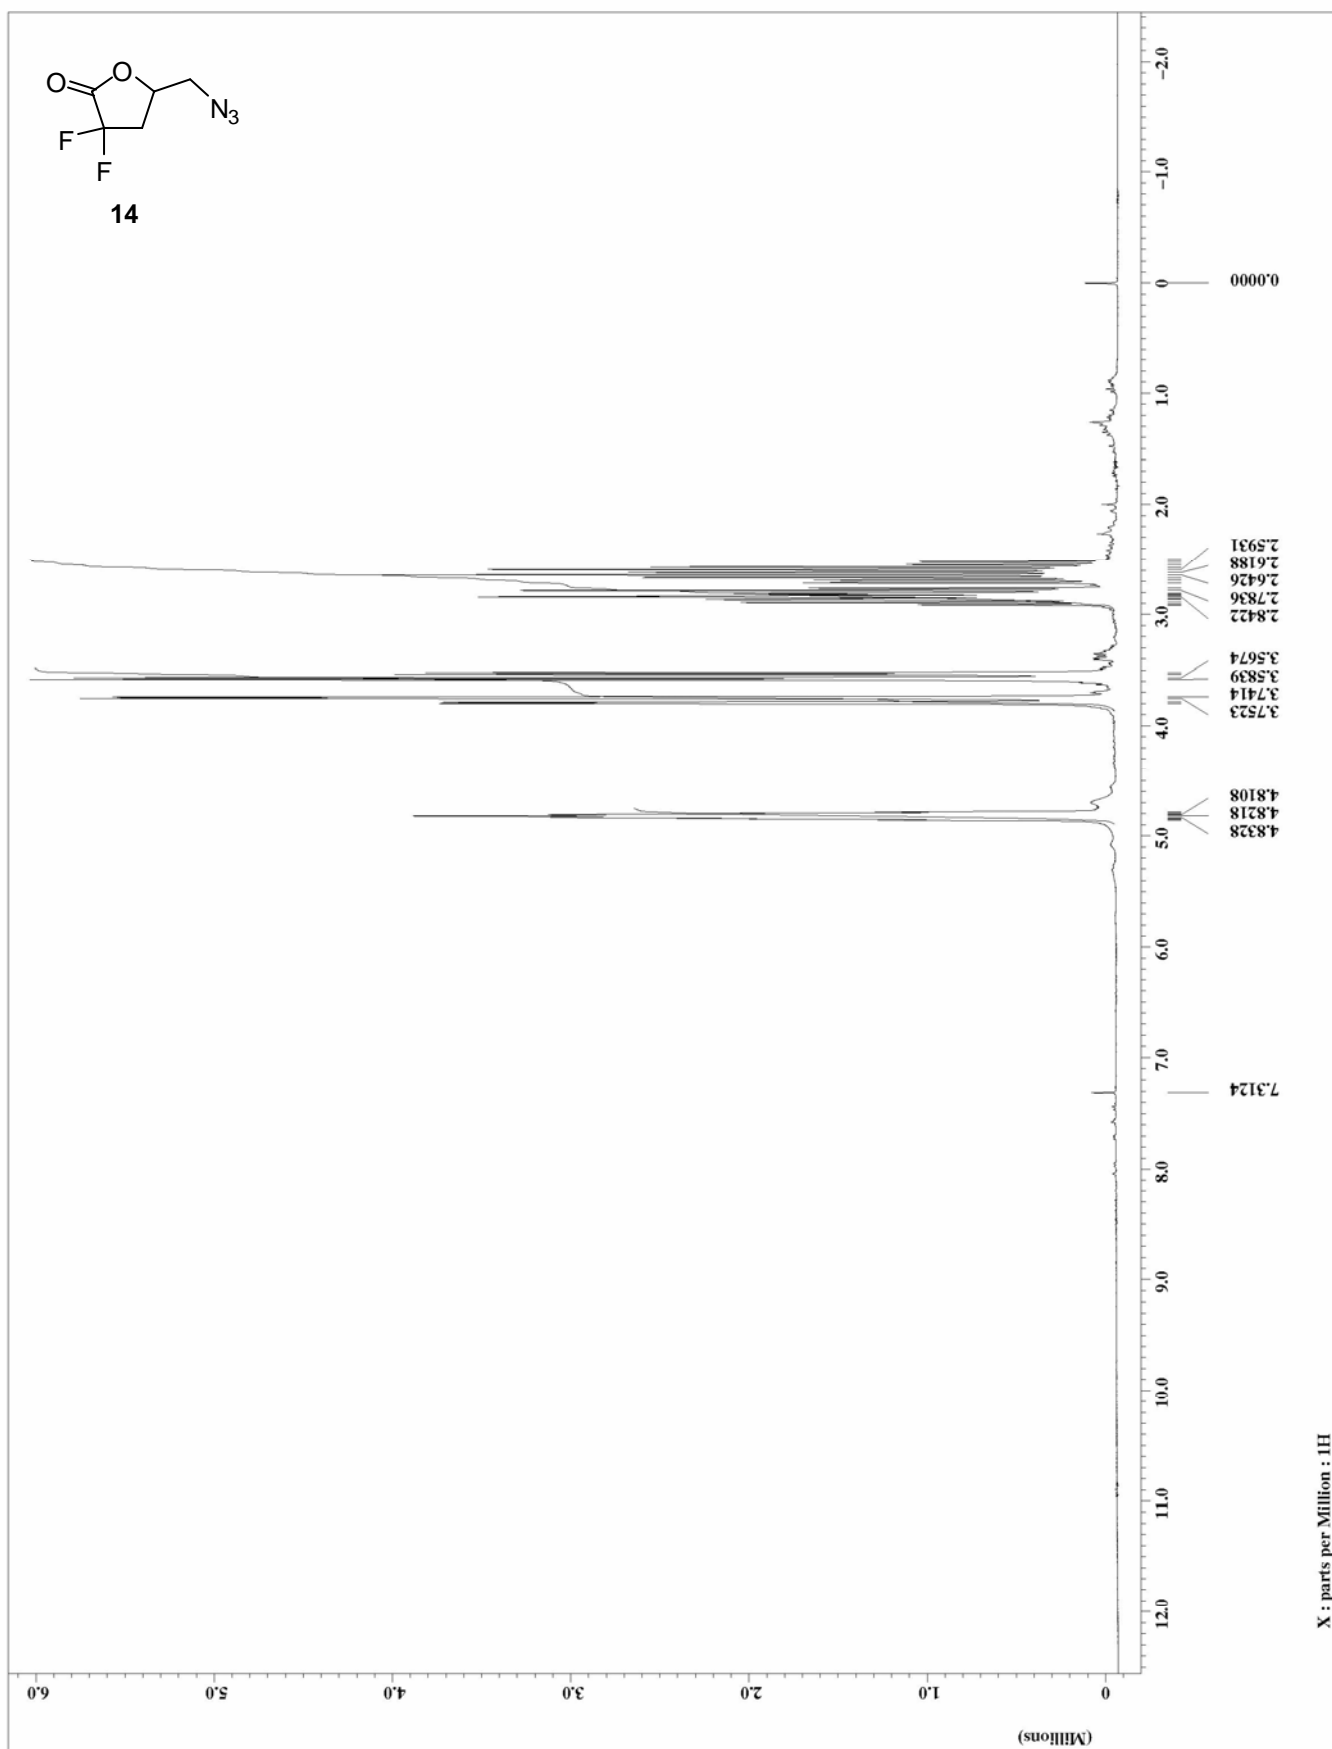



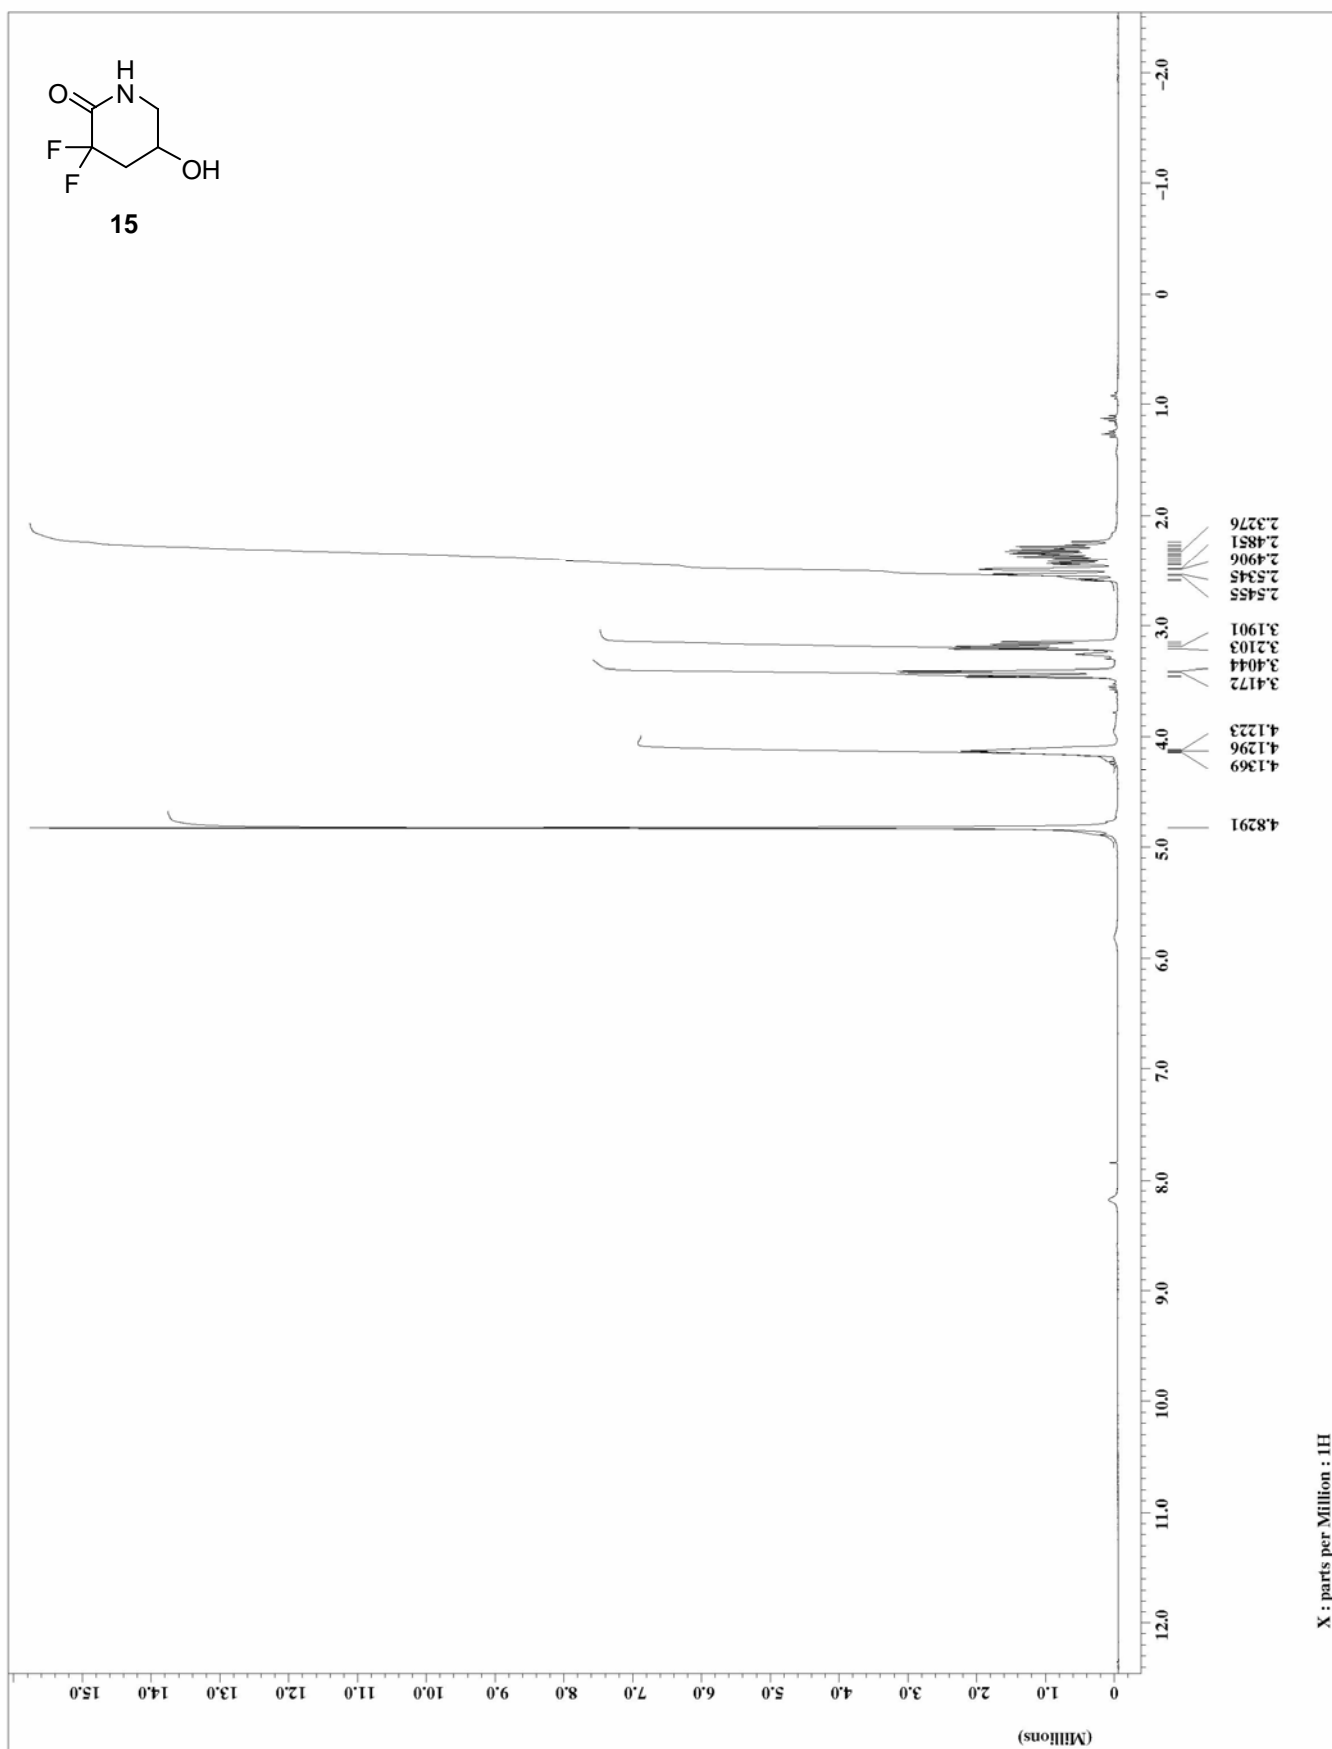

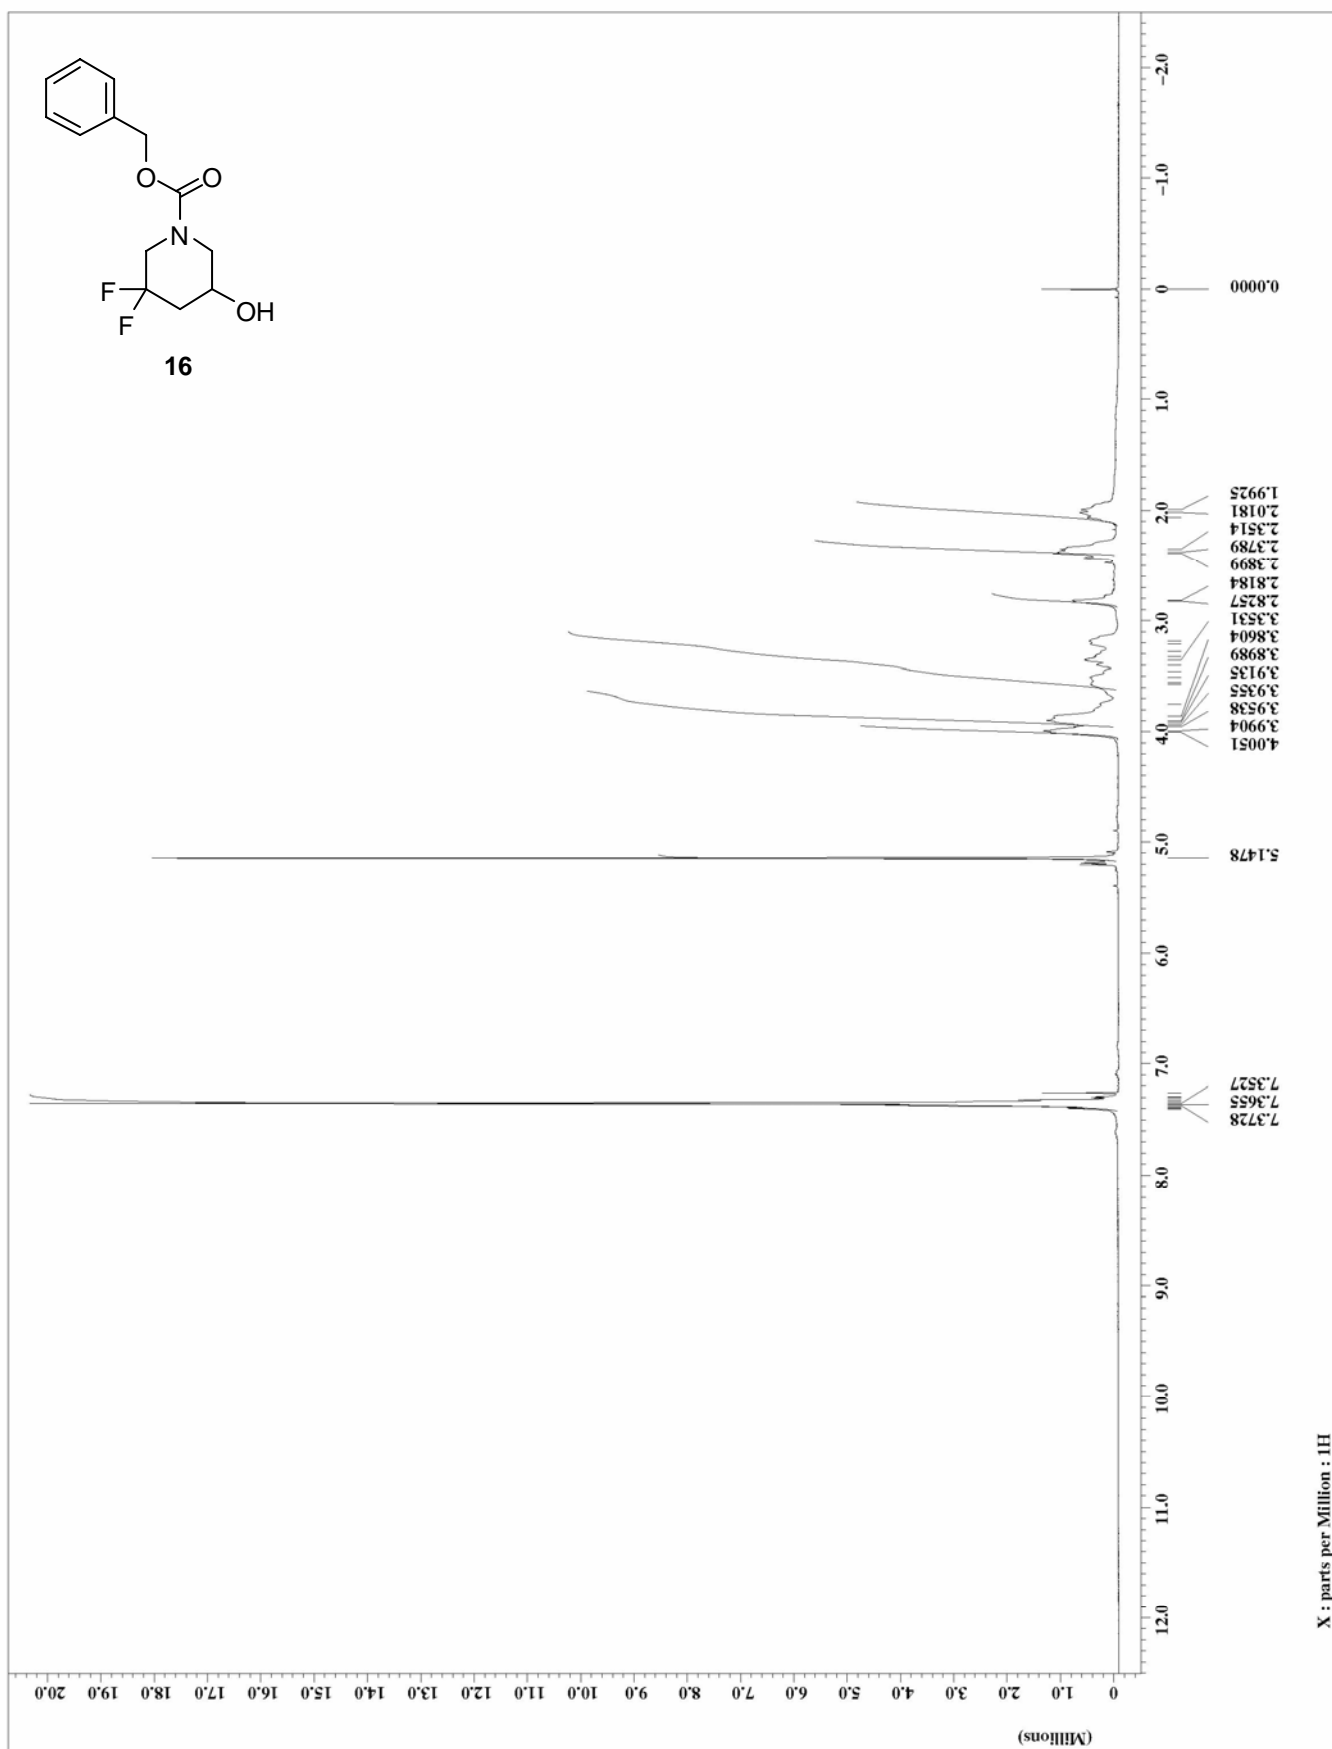

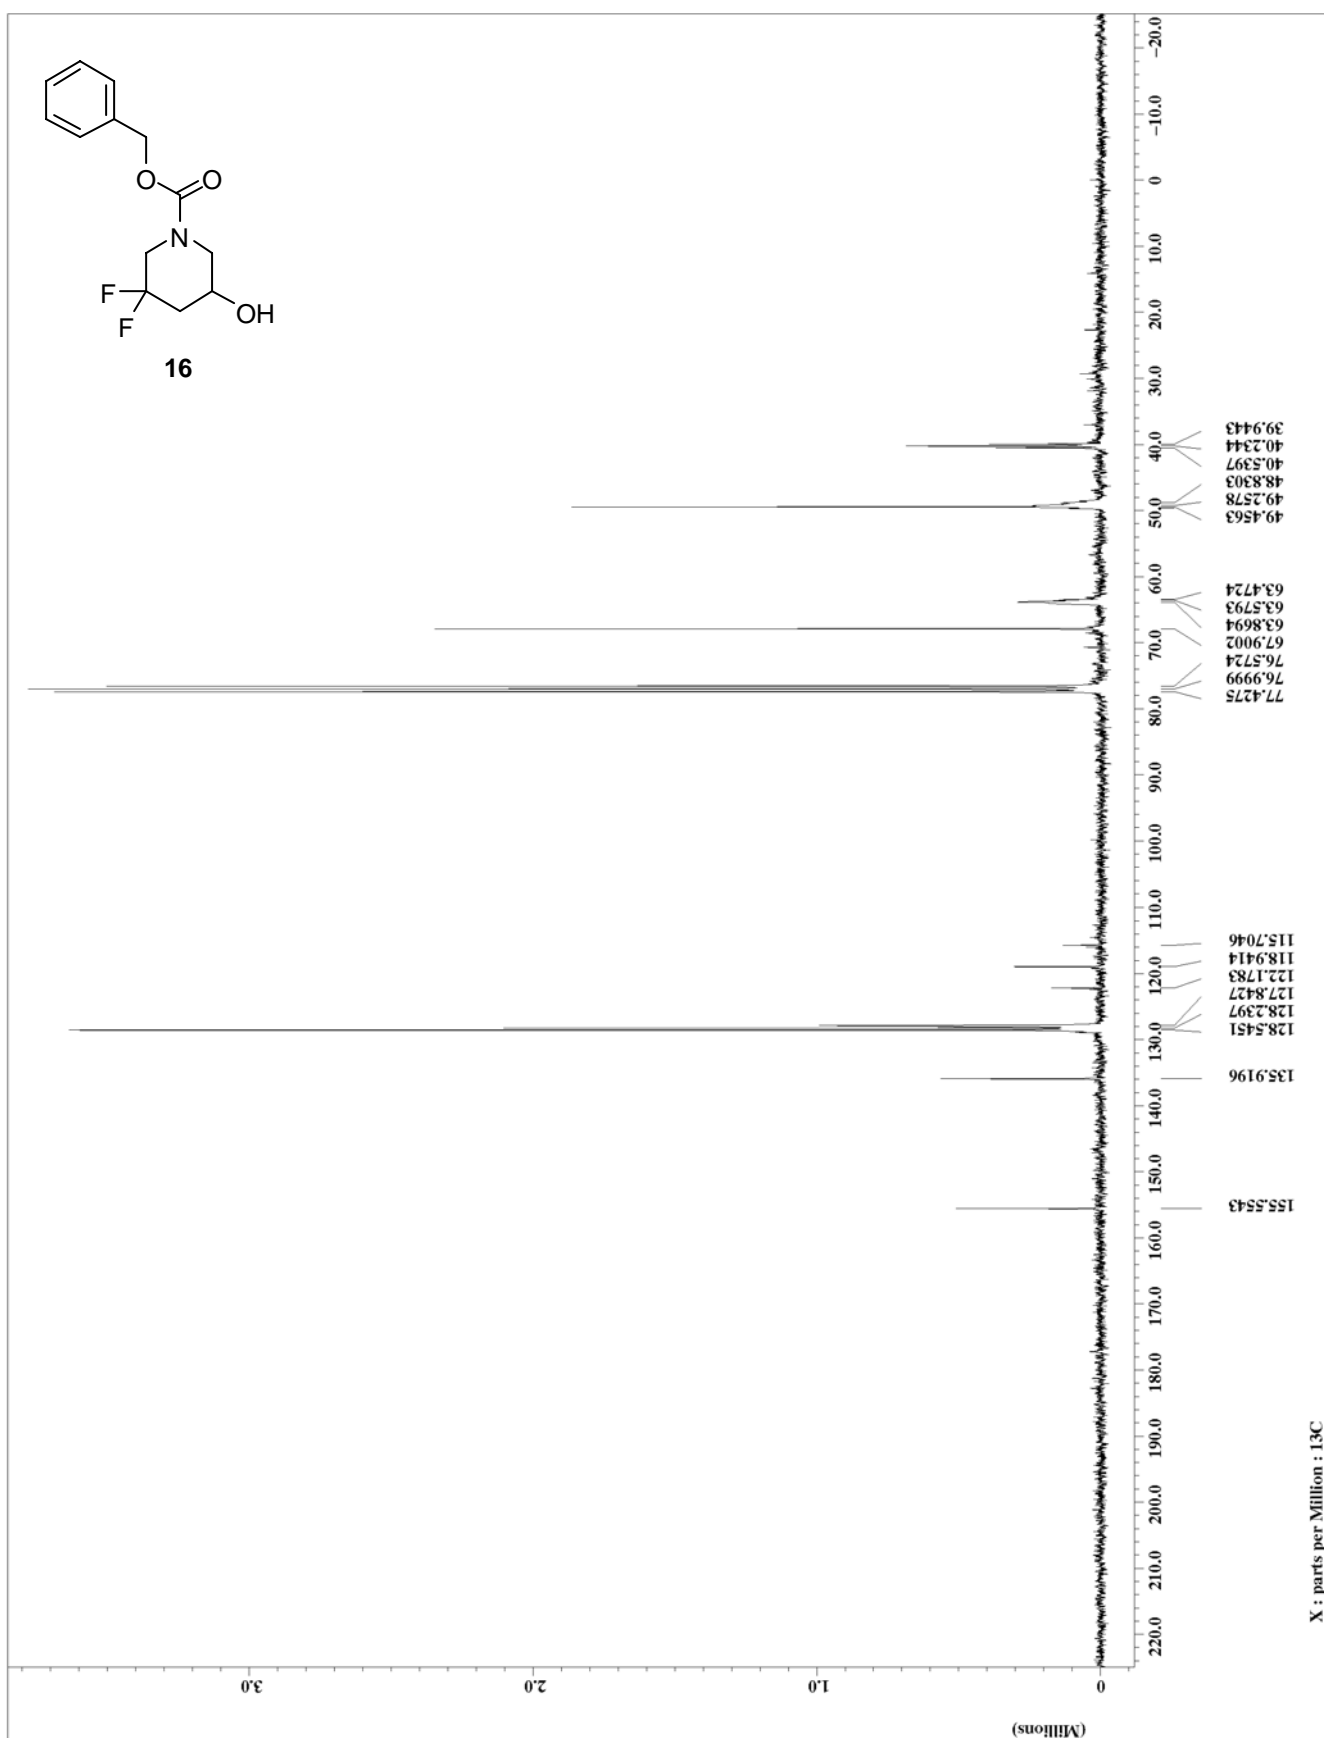

Print of window 38: Current Chromatogram(s)

16

Current Chromatogram(s)

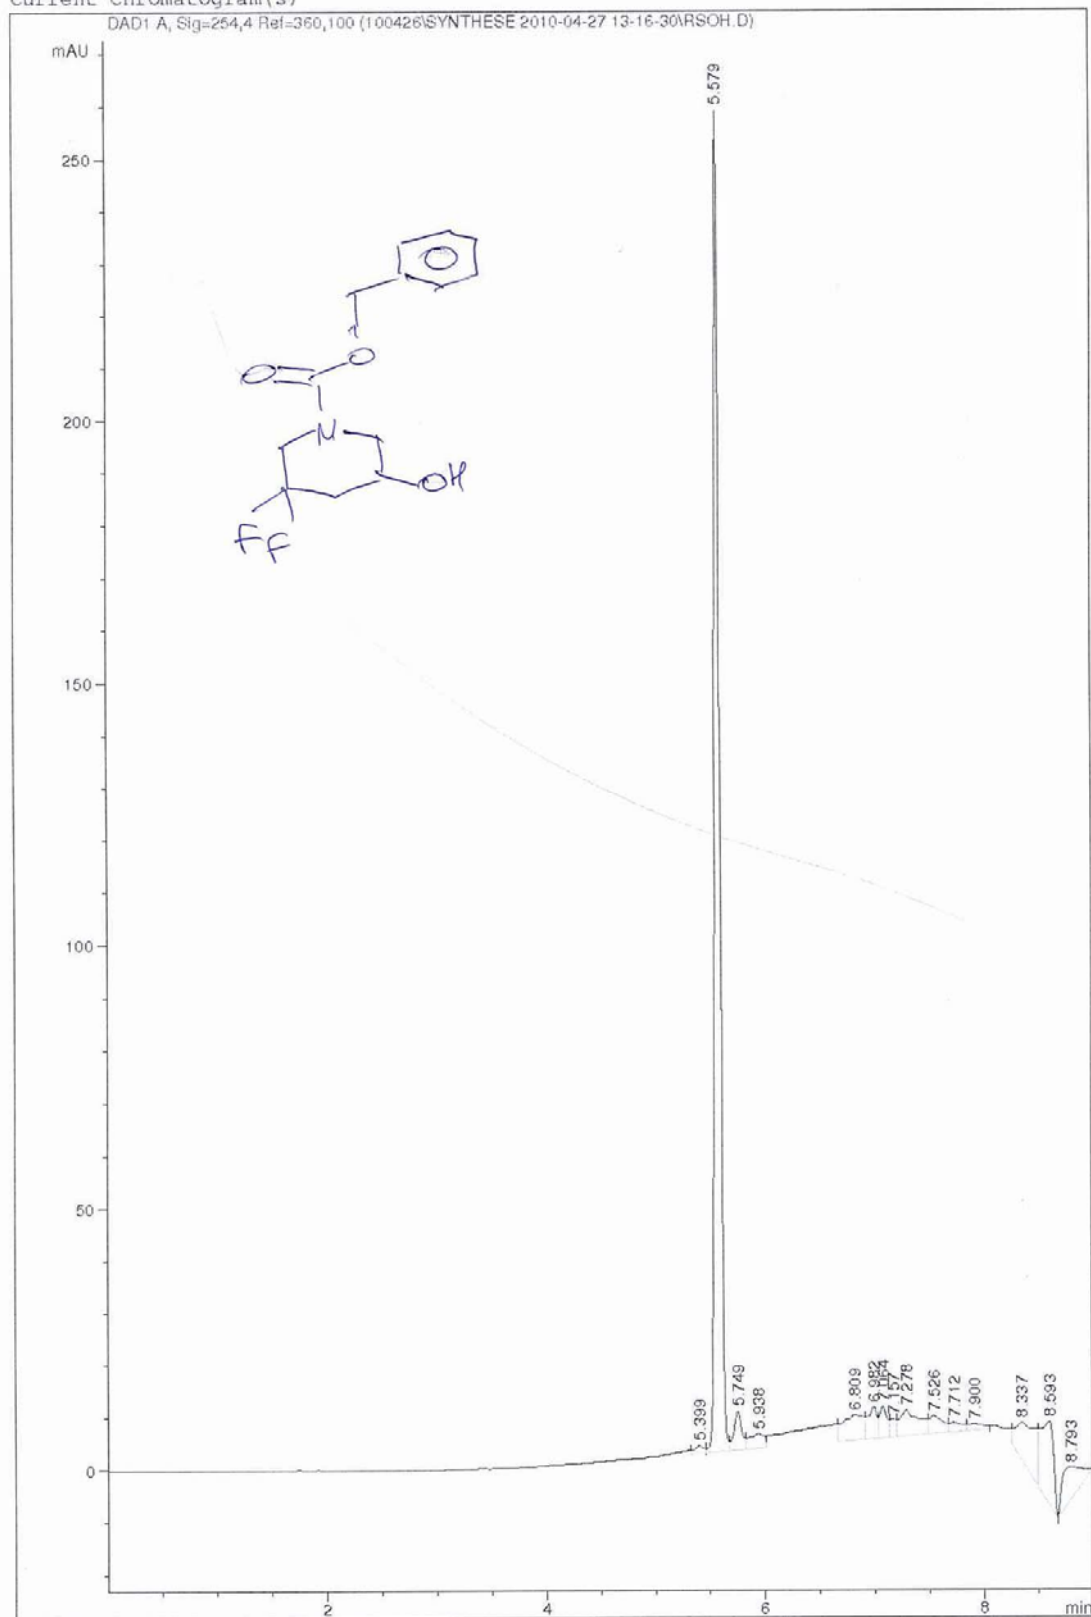

Instrument 2 4/27/2010 2:02:46 PM SC

Page 1 of 1

<sup>i</sup> Kendrick, D. A.; Danzin, C.; Kolb, M. *J. Med. Chem.* **1989**, *32*, 170.
